Intraocular water movement visualization using <sup>1</sup>H-MRI with eye drops of O-17 labeled saline: a first-in-human study

Moyoko Tomiyasu<sup>1\*</sup>, Yasuka Sahara<sup>1</sup>, Etsuko Mitsui<sup>1</sup>, Hiroki Tsuchiya<sup>2</sup>, Takamasa Maeda<sup>2</sup>, Nobuhiro Tomoyori<sup>3</sup>, Makoto Kawashima<sup>3</sup>, Toshifumi Nogawa<sup>4</sup>, Riwa Kishimoto<sup>5</sup>, Yuhei Takado<sup>6</sup>, Tatsuya Higashi<sup>1</sup>, Atsushi Mizota<sup>3</sup>, Kohsuke Kudo<sup>7</sup>, Takayuki Obata<sup>1</sup>

1. Department of Molecular Imaging and Theranostics, National Institutes for Quantum Science and Technology, Chiba, Japan
2. Department of Medical Technology, National Institutes for Quantum Science and Technology, Chiba, Japan.
3. Department of Ophthalmology, Teikyo University, Tokyo, Japan
4. Preventive Dentistry, Hokkaido University Hospital, Sapporo, Japan
5. Department of Radiology, National Institutes for Quantum Science and Technology, Chiba, Japan.
6. Functional Brain Imaging, National Institutes for Quantum Science and Technology, Chiba, Japan
7. Department of Diagnostic Imaging, Hokkaido University Faculty of Medicine, Sapporo, Japan

\*Corresponding author: Moyoko Tomiyasu, Department of Molecular Imaging and Theranostics, National Institutes for Quantum Science and Technology, 4-9-1 Anagawa, Inage-ku, Chiba 263-8555, Japan.

E-mail: [tomiyasu.moyoko@qst.go.jp](mailto:tomiyasu.moyoko@qst.go.jp); Tel.: +81-43-206-3230; Fax: +81-43-251-4531

## Abstract

**Background:** Visualization of aqueous humor flow in the human eye is difficult because gadolinium, a magnetic resonance imaging (MRI) contrast agent, does not readily cross the blood-retinal and blood-aqueous barriers of capillaries that supply water to the eye. The proton ( $^1\text{H}$ ) of oxygen-17 water ( $\text{H}_2^{17}\text{O}$ ) has a very short transverse relaxation time ( $T_2$ ), and the T2-weighted (T2W)  $^1\text{H}$ -MRI signal intensity of a region with  $\text{H}_2^{17}\text{O}$  is lower than that with only  $\text{H}_2^{16}\text{O}$ .

**Purpose:** To observe the distribution of  $\text{H}_2^{17}\text{O}$  in the human eye, and the flow into and out of the anterior chamber of  $\text{H}_2^{17}\text{O}$ , using dynamic T2W  $^1\text{H}$ -MRI.

**Materials and Methods:** Seven ophthalmologically normal adult volunteers under 40 years old participated in this study. During dynamic imaging, the subject self-administered 10 mol%  $\text{H}_2^{17}\text{O}$  saline (0.92–1.37 mL) to their right eye for 1 min. Time-series images were created by subtracting the image before the eye drops from each of the images obtained after the eye drops. The “normalized signal intensity of the right anterior chamber” (rAC) in each image was obtained by dividing the signal intensity of the right anterior chamber region-of-interest by that of the left. Changes in transverse relaxation rate and  $\text{H}_2^{17}\text{O}$  concentration ( $P_{O17}$ ) were calculated from the rAC. The inflow and outflow constants of  $\text{H}_2^{17}\text{O}$  in the right anterior chamber were also determined.

**Results:** Decreased signal intensity after the  $\text{H}_2^{17}\text{O}$  eye drops was observed in the anterior and posterior chambers, but not in the vitreous body. The rAC signal intensity decreased after the eye drops, and then recovered to close to rAC(0) at 40 min. The

inflow and outflow constants were  $0.53 \pm 0.19$  and  $0.055 \pm 0.019 \text{ min}^{-1}$ , respectively, and the peak value of  $P_{O17}$  was  $0.19 \pm 0.04\%$  (mean  $\pm$  SD).

**Conclusion:**  $\text{H}_2^{17}\text{O}$  saline eye drops distributed in the human anterior and posterior chambers. Further, the eye drops smoothly flowed into, and slowly out of, the anterior chamber.

### Summary

O-17 water dropped into human eyes as a T2-weighted MRI contrast agent was distributed in the anterior and posterior chambers, with smooth flow into, and slow outflow from, the anterior chamber.

### Key findings

In seven healthy volunteers, dynamic T2-weighted  $^1\text{H}$ -MRI showed that the signal intensity in the anterior chamber decreased smoothly after  $\text{H}_2^{17}\text{O}$  eye drops and then slowly recovered, reaching a value close to that observed before the eye drops, after 40 minutes, with inflow and outflow constants of  $\text{H}_2^{17}\text{O}$  of  $0.53 \pm 0.19 \text{ min}^{-1}$  and  $0.055 \pm 0.019 \text{ min}^{-1}$ , respectively. The signal changes were limited to the anterior and posterior chambers and were not observed in the vitreous body.

### Abbreviations

dT2W\_MRI = dynamic T2W  $^1\text{H}$ -MRI,

$\Delta R_{2,H}$  = transverse relaxation rate change of the  $\text{H}_2\text{O}$  proton,

$\text{H}_2^{17}\text{O}$  = oxygen-17 water,

IQR = interquartile range,

$P_{O17}$  = the molar fraction of  $H_2^{17}O$ ,

$R_{2,H}$  = transverse relaxation rate of the  $H_2O$  proton,

$R_{2,H}^{(16)}$  = transverse relaxation rate of the  $H_2^{16}O$  proton,

$R_{2,H}^{(17)}$  = transverse relaxation rate of the  $H_2^{17}O$  proton,

rAC = normalized signal intensity of the right anterior chamber,

ROI = region of interest

## Introduction

Abnormalities in the aqueous flow in the eye cause eye diseases such as glaucoma (1). If the flow of aqueous humor could be visualized, it would not only help in the diagnosis of glaucoma, but could also help with diagnoses and therapeutic effects for various other ocular diseases. Such visualization of water flow would also be expected to make a significant contribution to drug discovery.

Gadolinium, as a magnetic resonance imaging (MRI) contrast agent, does not pass smoothly through the blood-retinal barrier or the blood-aqueous barrier of the capillaries that supply water to the eye, and leakage of gadolinium from the ora serrata into the vitreous has been reported with aging (2). Therefore, although gadolinium can be used to assess deterioration of the barriers due to aging and other factors, it is difficult to use it to evaluate aqueous humor flow. Oxygen-15-labeled water used in positron emission tomography may be used to evaluate animal eyes, but it is not suitable for human eyes because of its short half-life (about 2 min). D<sub>2</sub>O saline solution has been administered to some animals *in vivo* and the dynamics of the aqueous humor evaluated (3, 4). However, it is unethical to apply D<sub>2</sub>O in humans because of its toxicity (5).

The protons in oxygen-17-labelled water (H<sub>2</sub><sup>17</sup>O) have six Larmor frequencies due to the scalar coupling with <sup>17</sup>O, which has a spin quantum number of 5/2, and the T<sub>2</sub> of the H<sub>2</sub><sup>17</sup>O proton is very short (6-10). The chemical exchange of protons between H<sub>2</sub><sup>17</sup>O and H<sub>2</sub><sup>16</sup>O also shortens the T<sub>2</sub> of the H<sub>2</sub><sup>16</sup>O protons. As a result, the T2-weighted (T2W) proton MRI (<sup>1</sup>H-MRI) signal intensity of a region with H<sub>2</sub><sup>17</sup>O is lower than that with only H<sub>2</sub><sup>16</sup>O. Several *in vivo* experiments using dynamic T2W <sup>1</sup>H-MRI (dT2W\_MRI) of H<sub>2</sub><sup>17</sup>O have been reported (11-13), and, recently, an *in vivo* experiment on the human central nervous system has also been reported (13).

We hypothesized that after H<sub>2</sub><sup>17</sup>O eye drop, the region with H<sub>2</sub><sup>17</sup>O in the eye would have low signal intensity on T2W images therefore the flow of H<sub>2</sub><sup>17</sup>O could be traced by dynamic imaging. Accordingly, our study using H<sub>2</sub><sup>17</sup>O saline eye drops was designed to observe the distribution of H<sub>2</sub><sup>17</sup>O in the eye, and to calculate its inflow and outflow ratios in the anterior chamber using dT2W\_MRI.

## **Methods**

### Subjects

Seven healthy ophthalmologically normal adult volunteers under 40 years old participated in this prospective study. Institutional Review Board approval and written informed consent were obtained.

### Hardware

All <sup>1</sup>H-MRI was performed using a clinical 3-T MR scanner (123.23 MHz; Magnetom Verio; Siemens Healthineers, Erlangen, Germany). A whole-body coil (bore diameter: 70 cm) and a 32-channel head coil (inner diameter: 22 cm) were used for radio frequency signal transmission and reception, respectively.

### Dynamic T2W <sup>1</sup>H-MRI

Prior to the dT2W\_MRI for the eye, T1-weighted sagittal 3-dimensional (3D) scout images (repetition time (TR)/echo time (TE), 3.15/1.37 msec; field-of-view (FOV), 260×260 mm; slice thickness, 1.6 mm; and matrix, 160×160×128) were recorded. The parameters of the dT2W\_MRI were as follows: a half-Fourier, single-shot, turbo-spin

echo sequence (14), TR/TE, 3000/444 msec; FOV, 180×180 mm; slice thickness, 3 mm; and matrix, 320×320 pixels, reconstructed to 640×640. During the dT2W\_MRI, the subjects applied 10 mol% H<sub>2</sub><sup>17</sup>O saline drops (0.92–1.37 mL; Taiyo Nippon Sanso, Tokyo, Japan) to their right eye for 1 min. Before and after the eye drops, the subjects were required to stare at a single point, to avoid eye movements. However, of the 3-sec TR, the time required for image acquisition was about 1 sec, and the subject could blink during the rest of the time. As this was the first trial to monitor H<sub>2</sub><sup>17</sup>O in the human eye using <sup>1</sup>H-MRI, the dT2W\_MRI imaging protocol was modified during the course of the study, resulting in 3 patterns of sequential actions by the subjects and total scan times of 12 or 42 min (Fig. 1). In the 2 protocols with the 42 min scan time, some periods were inserted in which the subjects could have a rest (Eyes\_closed).

#### Signal quantification of the dynamic images

In-house software developed in MATLAB (MathWorks, Natic, MA) was used for the data analysis. First, the images were registered by the 2D affine transformation method (imregdemons in MATLAB). To investigate the variation across time in the signal intensities of the images, a time series of subtracted images were created as follows: each average image was created from 8–10 consecutive images obtained at a certain time; then the averaged image obtained prior to the eye drops was subtracted from each of those images. Three regions of interest (ROIs), located in the left and right anterior chambers and the left vitreous body, each of size 1.66 mm<sup>2</sup> (7×3 pixels), were selected manually in the registered image (Supplementary Fig. 1). The normalized signal intensity of the right anterior chamber (rAC) for each image was obtained by dividing the signal intensity of the ROI of the right anterior chamber by that of the left. A linear

relationship between  $\text{H}_2^{17}\text{O}$  concentration and the transverse-relaxation-rate change of the  $\text{H}_2\text{O}$  proton ( $\Delta R_{2,H}$ ), obtained from the MR signal intensity change, has been reported (7, 12). In our study, the  $\Delta R_{2,H}$  of rAC was calculated using the following equation (12):

$$\Delta R_{2,H}(t) = \frac{\left[ -\ln \left\{ \frac{rAC(t)}{rAC(0)} \right\} \right]}{TE}, \quad [1]$$

where  $rAC(0)$  is the signal intensity before the eye drops and  $TE = 0.444$  sec is the  $dT2W\_MRI$  parameter used in our study. The transverse relaxation rate of the  $\text{H}_2^{17}\text{O}$  proton ( $R_{2,H}^{(17)}$ ) with 100% concentration was calculated using the following equation (9, 15):

$$R_{2,H}^{(17)} = \frac{\tau \delta^2}{3} \left( \frac{1}{1 + \tau^2 \delta^2} + \frac{9}{1 + 9\tau^2 \delta^2} + \frac{25}{1 + 25\tau^2 \delta^2} \right), \quad [2]$$

where  $\tau$  is the proton-exchange lifetime, which is assumed to be  $1.8 \times 10^{-3} \text{ sec}^{-1}$  (6);  $\delta = \frac{J}{2} \times 2\pi$ , and  $J$  is the  $^{17}\text{O}$ - $^1\text{H}$  scalar-coupling constant, which was measured as 91 Hz (16). The transverse relaxation of the  $\text{H}_2\text{O}$  proton ( $R_{2,H}$ ) in the presence of  $\text{H}_2^{16}\text{O}$  and  $\text{H}_2^{17}\text{O}$  can be described by the following equation (15):

$$R_{2,H} = (1 - P_{O17})(R_{2,H}^{(16)}) + P_{O17} (R_{2,H}^{(17)}), \quad [3]$$

where  $P_{O17}$  is the molar fraction of  $\text{H}_2^{17}\text{O}$ , and  $R_{2,H}^{(16)}$  is the transverse relaxation rate of the  $\text{H}_2^{16}\text{O}$  proton. The  $\Delta R_{2,H}$  at time =  $t$  is represented by the following equation:

$$\Delta R_{2,H}(t) = R_{2,H}(t) - R_{2,H}(0), \quad [4]$$

where  $R_{2,H}(0)$  is the value at the time before the eye drops and is the same as  $R_{2,H}^{(16)}$ .

Using equations [1] to [4], and the fact that  $R_{2,H}^{(16)} = 0.77 \text{ sec}^{-1}$  (17),  $P_{O17}$  in the right



anterior chamber ROI was calculated. For the interval during which  $P_{O17}$  increased, the following exponential equation was fitted, to obtain the inflow constant of  $H_2^{17}O$ :

$$P_{O17} = A [1 - \exp\{-B \times (t - C)\}], 1 \leq t \leq 9 \text{ min}, \quad [5]$$

where A, B and C are constants; B is the inflow constant. A represents the maximum concentration of  $H_2^{17}O$  and C represents the gap time between the end of  $H_2^{17}O$  administration and the beginning of the  $P_{O17}$  change. Conversely, during the period when  $P_{O17}$  was decreasing, the outflow constant was obtained by fitting the following exponential equation:

$$P_{O17} = D \{\exp(-E \times t)\}, 14 \leq t \leq 40 \text{ min}, \quad [6]$$

where D and E are constants; E is the outflow constant. Since the period from 9 or 10 min to 14 min was the Eyes\_closed period, or the dT2W\_MRI acquisition was finished at 10 min for some subjects,  $1 \leq t \leq 9 \text{ min}$  and  $\geq 14 \text{ min}$  were used to calculate the inflow and outflow constants, respectively (Fig. 1).

The quality criteria for each image data and series of data are as follows: the images obtained during the Eyes\_closed periods, and the images with motion artifacts were not used in the analyses (Supplementary Figs. 1 and 2). Images with motion artifacts were those in which the signal intensity in the left vitreous ROI was within the outlier range defined by the interquartile range (IQR) method. The IQR was the difference in the values between 25% (Q1) and 75% (Q3) in the left vitreous ROI across all images, after excluding the images obtained during the Eyes\_closed periods in each subject. Values smaller than  $Q1 - 1.5 \times IQR$  or larger than  $Q3 + 1.5 \times IQR$  were classified as outliers (Supplementary Fig. 1). The dT2W\_MRI data with a coefficient of determination ( $R^2$ ) of less than 0.1 for the fitting curve of equation [5] or [6] were excluded.

## Results

dT2\_MRI data were obtained from each of seven subjects, but the data that did not meet quality criteria were excluded, resulting in a five final data set. One of them had a short acquisition time of 12 min and was used only for the calculation of inflow constants.

Decreased signal intensity in the dT2W\_MRI after the H<sub>2</sub><sup>17</sup>O eye drops was observed in the right anterior and posterior chambers but not in the right vitreous body, as shown in Figure 2. The rAC signal intensity decreased after the eye drops, and then began to recover, reaching a value close to rAC(0) at 40 min (Fig. 3).

Combining the results from each subject, the time-variation values in H<sub>2</sub><sup>17</sup>O concentration in the right anterior chamber were as follows [mean ± SD (range)]: inflow constant (n = 5), 0.53 ± 0.19 min<sup>-1</sup> (0.37–0.87 min<sup>-1</sup>); outflow constant (n = 4), 0.055 ± 0.019 min<sup>-1</sup> (0.038–0.072 min<sup>-1</sup>); maximum concentration (n = 5), 0.19% ± 0.04% (0.14%–0.24%) (Figs. 4 and 5).

## Discussion

In our prospective study, we quantitatively assessed time-variation changes of H<sub>2</sub><sup>17</sup>O concentration in *in vivo* human eye using dT2W\_MRI, which was performed with a clinical 3-T scanner. There did not seem to be any change in the signal intensity in the left anterior chamber associated with the eye drops (Supplementary Fig. 1).

The ranges of the inflow and outflow constants were 0.37–0.87 min<sup>-1</sup> and 0.02–0.07 min<sup>-1</sup>, respectively. Although there were substantial individual differences, the inflow constant was larger than the outflow constant in each subject as well as the averages,

indicating that H<sub>2</sub><sup>17</sup>O saline eye drops flow smoothly into the anterior chamber, and then flow slowly out again.

There have been no reports of H<sub>2</sub><sup>17</sup>O being administered to human eyes *in vivo*, but there is one report in animal eyes (12). Kwong et al. administered H<sub>2</sub><sup>17</sup>O eye drops to rabbits, and observed water movement in the rabbits' eyes using 1.5-T MRI (12). The authors determined the H<sub>2</sub><sup>17</sup>O outflow constants from the anterior chamber using both <sup>1</sup>H-MRI and <sup>17</sup>O-MR spectroscopy, and found values of 0.084 and 0.107 min<sup>-1</sup>, respectively (12). Similar observations in rabbit eyes were reported by Obata et al.(4) in <sup>2</sup>H-MRI with D<sub>2</sub>O. In their study, the outflow constant of D<sub>2</sub>O from the rabbit anterior chamber was 0.113 ± 0.017 min<sup>-1</sup> (n = 4), which was similar to that with H<sub>2</sub><sup>17</sup>O in Kwong et al.'s study (12). In our human study, the outflow constants [0.055 ± 0.019 min<sup>-1</sup>, 0.038–0.072 min<sup>-1</sup>, (n = 4)] were smaller than the earlier rabbit values, suggesting that water may flow out more slowly from the anterior chamber in humans than in rabbits. However, the coefficient of determination (R<sup>2</sup>) for the outflow constant was smaller than that of the inflow constant for each subject (Figs. 4, 5), suggesting that the outflow constant may also be affected by data instability resulting from the very long scan times.

Regarding the time variation of the dynamic <sup>1</sup>H-MR images in our H<sub>2</sub><sup>17</sup>O study, the signal changes were limited to the anterior and posterior chambers and were not observed in the vitreous body (Fig. 2). In the H<sub>2</sub><sup>17</sup>O experiment in rabbit eyes, only the signal reduction and recovery in the anterior chamber by <sup>1</sup>H-MRI was described (12). In a D<sub>2</sub>O study in rabbits, signal change in the vitreous body was observed, in addition to the changes in the anterior and posterior chambers (4). Considering those results, although the possibility that H<sub>2</sub><sup>17</sup>O flowed into the vitreous in the present study cannot

be denied, the signal changes would only have been at the noise level.

The method used in the present study also has the potential to evaluate the rate of aqueous humor exchange such as in diseases such as glaucoma, and in diseases during their treatment with drugs. However, it took about 40 min to monitor the H<sub>2</sub><sup>17</sup>O saline washing out of the anterior chamber. When applying this method to a patient, it is necessary for them to keep their eyes opened and fixated for a long period, which is burdensome and may also result in increased motion artifacts. The development of less-burdensome imaging methods, including shorter imaging times, may make it possible to acquire more-stable MR images with fewer motion artifacts.

## **Conclusion**

Our results using dT2W\_MRI showed that H<sub>2</sub><sup>17</sup>O saline eye drops were distributed in the human anterior and posterior chambers. Also, the eye drops smoothly flowed into, and slowly out of, the anterior chamber. Further measurements on healthy volunteers are needed to confirm the reliability of the values obtained in this study.

## **Acknowledgments**

The authors thank Ms. S. Kawakami and Ms. H. Yamashita, Dr. H. Tsuji, and Dr. M. Makishima for their support of our clinical trial study. This work was supported by a Grant-in-Aid (Public/Private R&D Investment Strategic Expansion Program: PRISM) from the Cabinet Office, Japan. We thank Claire Barnes, PhD, from Edanz (<https://jp.edanz.com/ac>) for editing a draft of this manuscript.

## Figure Legends

**Figure 1. Sequences of actions for the subjects during dynamic T2-weighted  $^1\text{H}$  magnetic resonance imaging.** Time  $t = 0$  is the end of the application of  $\text{H}_2^{17}\text{O}$  eye drops.

**Figure 2. Representative T2-weighted (T2W)  $^1\text{H}$  magnetic resonance imaging (MRI) and sequential subtracted images from the right eye of a subject in their 20's.** Left-most: T2W image obtained before the application of the  $\text{H}_2^{17}\text{O}$  eye drops. Upper row: each image is the averaged image, obtained during the time period shown at the bottom of the column, subtracted from the averaged image obtained before the  $\text{H}_2^{17}\text{O}$  eye drops (left-most). Time  $t = 0$  is the end of the eye drops. Lower row: each of the corresponding images in the upper row superimposed on a T2W image. The time axis of the averaged-image acquisition is shown in Figure 3. AC = anterior chamber, PC = posterior chamber, VB = vitreous body.

**Figure 3. Representative variation across time in the normalized signal intensity in the right anterior chamber (rAC) obtained from dynamic T2-weighted  $^1\text{H}$  magnetic resonance imaging (a subject in their 20's).** The signal intensity was obtained by dividing the signal from the right anterior chamber region of interest (ROI) by that from the left. The blue and red areas in the upper-right image show the ROIs ( $1.66 \text{ mm}^2$ , each) for the right and left eyes, respectively. Time  $t = 0$  is the end of the eye drops. The labels (Ⓐ – Ⓔ) at the top of the plot indicate the data-collection times for creating the subtracted images in Figure 2.

**Figure 4. Time variations ( $-2 \leq t \leq 9 \text{ min}$ ) in the  $\text{H}_2^{17}\text{O}$  concentration [conc.(%)] of the right anterior chamber.** Time  $t = 0$  is the end of the eye drops. The exponential curves were fitted with equations of the form  $A [1 - \exp\{-B \times (t - C)\}]$ , fitted at time ( $1 \leq t \leq 9 \text{ min}$ ), the parameters for which are shown on the graphs.  $R^2$  is the coefficient of determination. Bottom-right: plots of all fitting curves.

**Figure 5. Time variations ( $14 \leq t \leq 40 \text{ min}$ ) in the  $\text{H}_2^{17}\text{O}$  concentration [conc.(%)] of the right anterior chamber.** Time  $t = 0$  is the end of the eye drops. The data were fitted with the exponential curve  $D\{\exp(-E \times t)\}$ , with the parameters shown on the plots.  $R^2$  is the coefficient of determination. Bottom row: plots of all fitting curves.

**Supplementary Figure 1. Representative time variations in the signal intensities of regions of interest (ROIs) of dynamic T2-weighted  $^1\text{H}$  magnetic resonance imaging (a subject in their 20's).** A: Signal intensities in the the right (blue) and left (red) anterior chambers. The signal intensities were normalized by dividing each by the signal intensity before the eye drops. B: Signal in the left vitreous body (green). The images with signal intensities outside the red frame are outliers in the interquartile range method, and were not used in the data analysis. C: the ROIs of each region are shown on the image ( $1.66 \text{ mm}^2$ , each).

**Supplementary Figure 2. Representative time-series images of dynamic T2-weighted  $^1\text{H}$  magnetic resonance imaging (a subject in their 20's).** Each number on the right corresponds to the data-collection number of the images to the left. The images in the blue frame were obtained during the  $\text{H}_2^{17}\text{O}$  saline-drop period. The images in the red frames were rest periods (Eyes\_closed), which were not used in the data analysis.

## References

1. Allingham RR, Moroi SE, Shields MB, Damji KF. Shields' Textbook of Glaucoma. 7th ed: LWW, 2020.
2. Naganawa S, Ito R, Kawamura M, Taoka T, Yoshida T, Sone M. Peripheral Retinal Leakage after Intravenous Administration of a Gadolinium-based Contrast Agent: Age Dependence, Temporal and Inferior Predominance and Potential Implications for Eye Homeostasis. *Magn Reson Med Sci* 2021. doi: 10.2463/mrms.mp.2021-0100
3. Obata T, Ikehira H, Shishido F, Fukuda N, Ueshima Y, Koga M, Kato H, Kimura F, Tateno Y. Deuterium MR in vivo imaging of the rat eye using  $^2\text{H}_2\text{O}$ . *Acta Radiol* 1995;36(5):552-555.
4. Obata T, Ikehira H, Koga M, Yoshida K, Kimura F, Tateno Y. Deuterium magnetic resonance imaging of rabbit eye *in vivo*. *Magn Reson Med* 1995;33(4):569-572. doi: 10.1002/mrm.1910330417
5. Czajka DM, Finkel AJ, Fischer CS, Katz JJ. Physiological effects of deuterium on dogs. *Am J Physiol* 1961;201:357-362. doi: 10.1152/ajplegacy.1961.201.2.357
6. Meiboom S. Nuclear Magnetic Resonance Study of the Proton Transfer in Water. *J Chem Phys* 1961;34:375.
7. Hopkins AL, Barr RG. Oxygen-17 compounds as potential NMR  $T_2$  contrast agents: enrichment effects of  $\text{H}_2^{17}\text{O}$  on protein solutions and living tissues. *Magn Reson Med* 1987;4(4):399-403. doi: 10.1002/mrm.1910040413
8. Yeung HN, Lent AH. Proton transverse relaxation rate of  $^{17}\text{O}$ -enriched water. *Magn Reson Med* 1987;5(1):87-92. doi: 10.1002/mrm.1910050112
9. Stolpen AH, Reddy R, Leigh JS.  $^{17}\text{O}$ -decoupled proton MR spectroscopy and imaging in a tissue model. *J Magn Reson* 1997;125(1):1-7. doi: 10.1006/jmre.1996.1071
10. Elliott SJ, Bengs C, Kouril K, Meier B, Alom S, Whitby RJ, Levitt MH. NMR Lineshapes and Scalar Relaxation of the Water-Endofullerene  $\text{H}_2^{17}\text{O}@C_{60}$ . *Chemphyschem* 2018;19(3):251-255. doi:

10.1002/cphc.201701330

11. Kwong KK, Hopkins AL, Belliveau JW, Chesler DA, Porkka LM, McKinstry RC, Finelli DA, Hunter GJ, Moore JB, Barr RG, et al. Proton NMR imaging of cerebral blood flow using  $H_2^{17}O$ . *Magn Reson Med* 1991;22(1):154-158. doi: 10.1002/mrm.1910220116

12. Kwong KK, Xiong J, Kuan WP, Cheng HM. Measurement of water movement in the rabbit eye in vivo using  $H_2^{17}O$ . *Magn Reson Med* 1991;22(2):443-450. doi: 10.1002/mrm.1910220252

13. Kudo K, Harada T, Kameda H, Uwano I, Yamashita F, Higuchi S, Yoshioka K, Sasaki M. Indirect Proton MR Imaging and Kinetic Analysis of  $^{17}O$ -Labeled Water Tracer in the Brain. *Magn Reson Med Sci* 2018;17(3):223-230. doi: 10.2463/mrms.mp.2017-0094

14. Patel MR, Klufas RA, Alberico RA, Edelman RR. Half-fourier acquisition single-shot turbo spin-echo (HASTE) MR: comparison with fast spin-echo MR in diseases of the brain. *AJNR Am J Neuroradiol* 1997;18(9):1635-1640.

15. Kudo K, Harada T, Kameda H, Uwano I, Yamashita F, Higuchi S, Yoshioka K, Sasaki M. Indirect MRI of  $^{17}O$ -labeled water using steady-state sequences: Signal simulation and preclinical experiment. *J Magn Reson Imaging* 2018;47(5):1373-1379. doi: 10.1002/jmri.25848

16. Burnett LJ, Zeltmann AH.  $^1H$ - $^{17}O$  spin-spin coupling constant in liquid water. *J Chem Phys* 1974;60:4636.

17. Fanea L. Reference 3T MRI parameters of the normal human eye. *Phys Med* 2018;47:50-57. doi: 10.1016/j.ejmp.2018.02.007



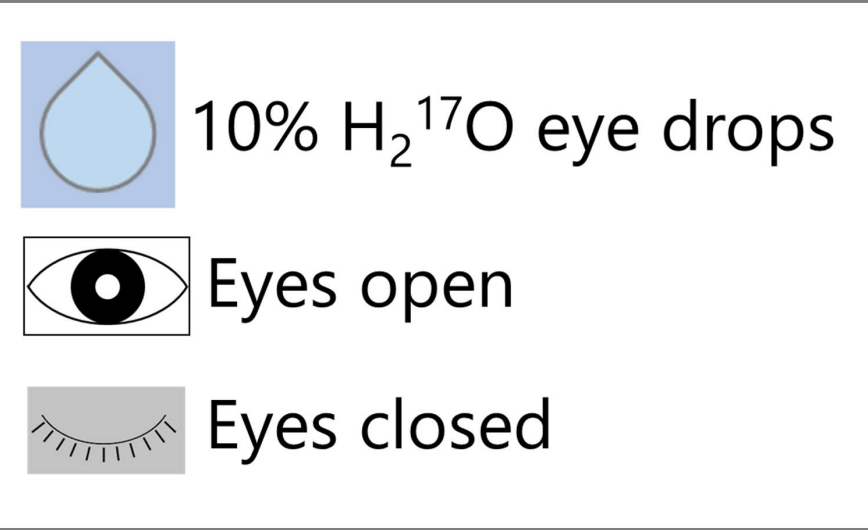

**Subjects 1 & 2**

**Subject 3**

**Subjects 4-7**

-3      0                      10                      20                      30                      40

Time (min)

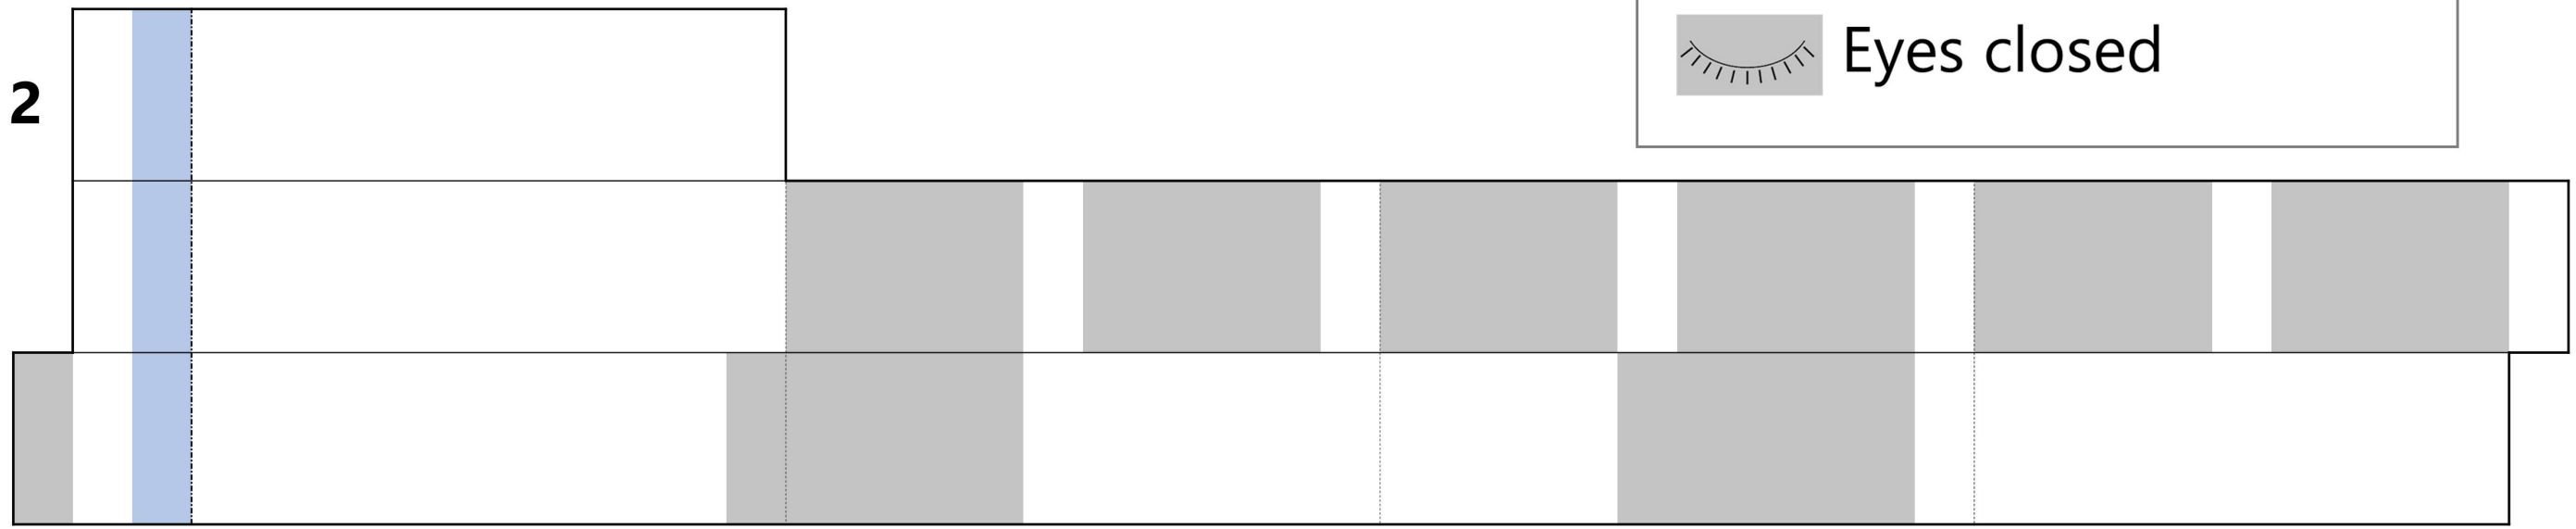

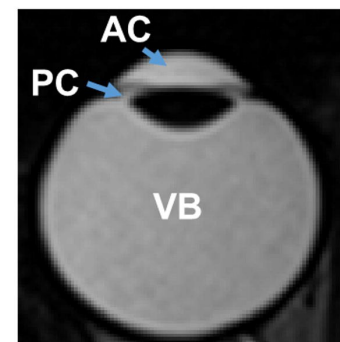

①

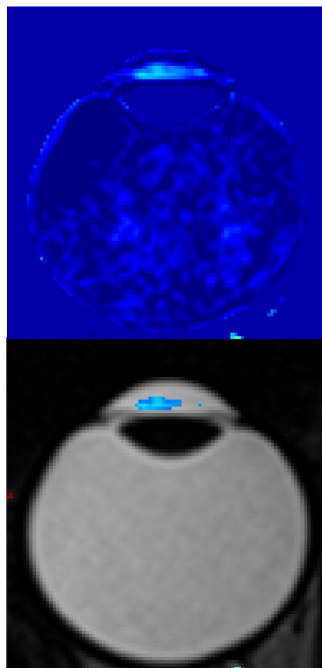

2.0-2.5

②

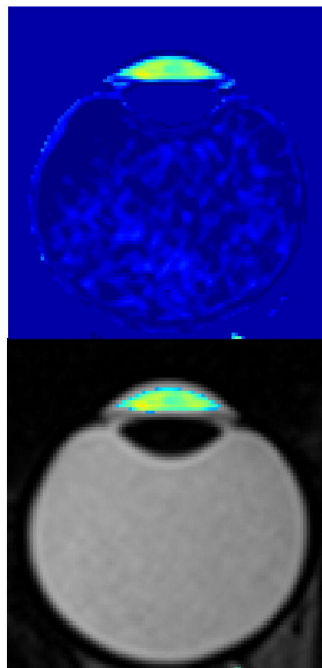

4.0-4.5

③

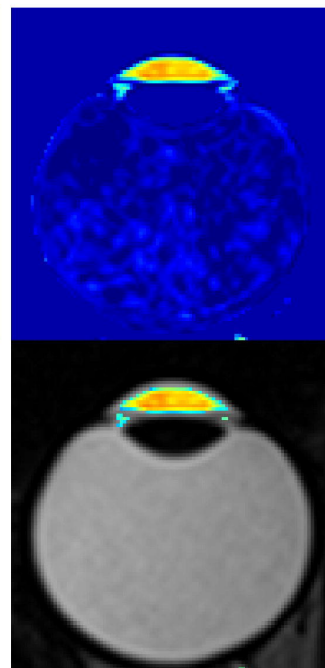

6.0-6.5

④

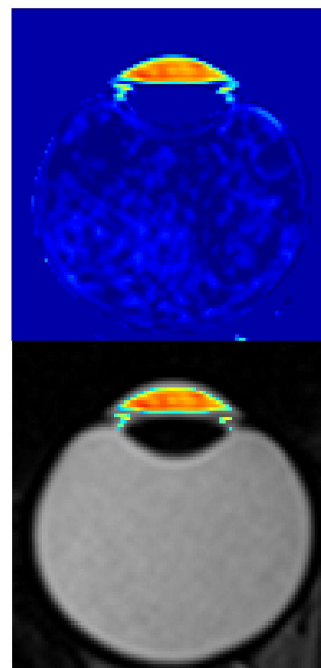

8.0-8.5

⑤

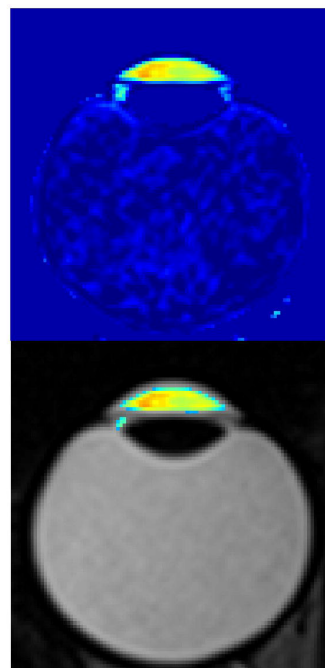

18.0-18.5

⑥

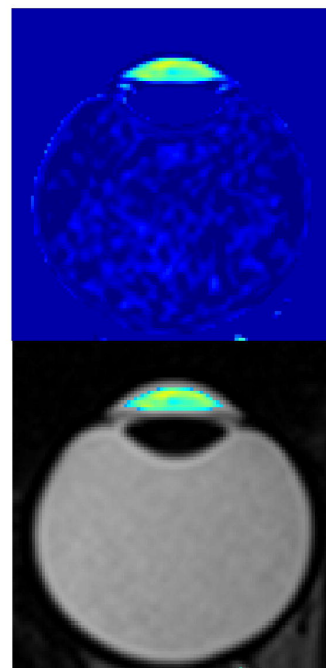

23.0-23.5

⑦

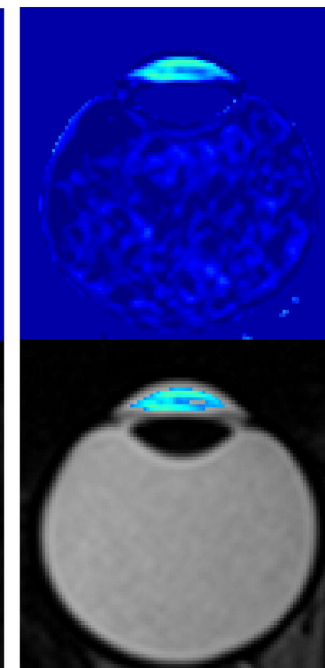

33.0-33.5

⑧

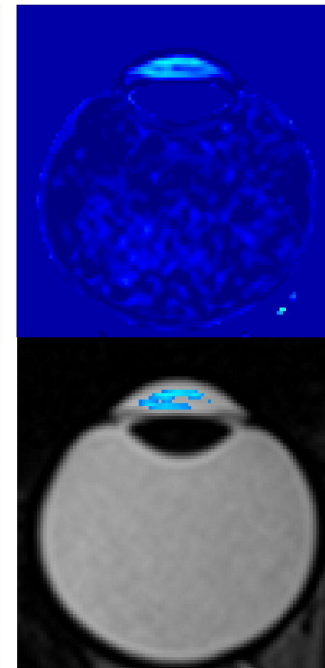

38.0-38.5

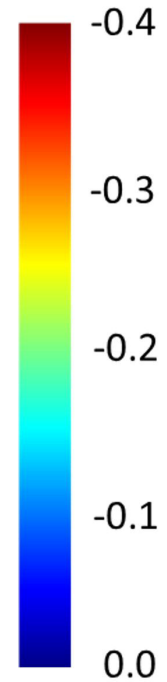

Time (min)

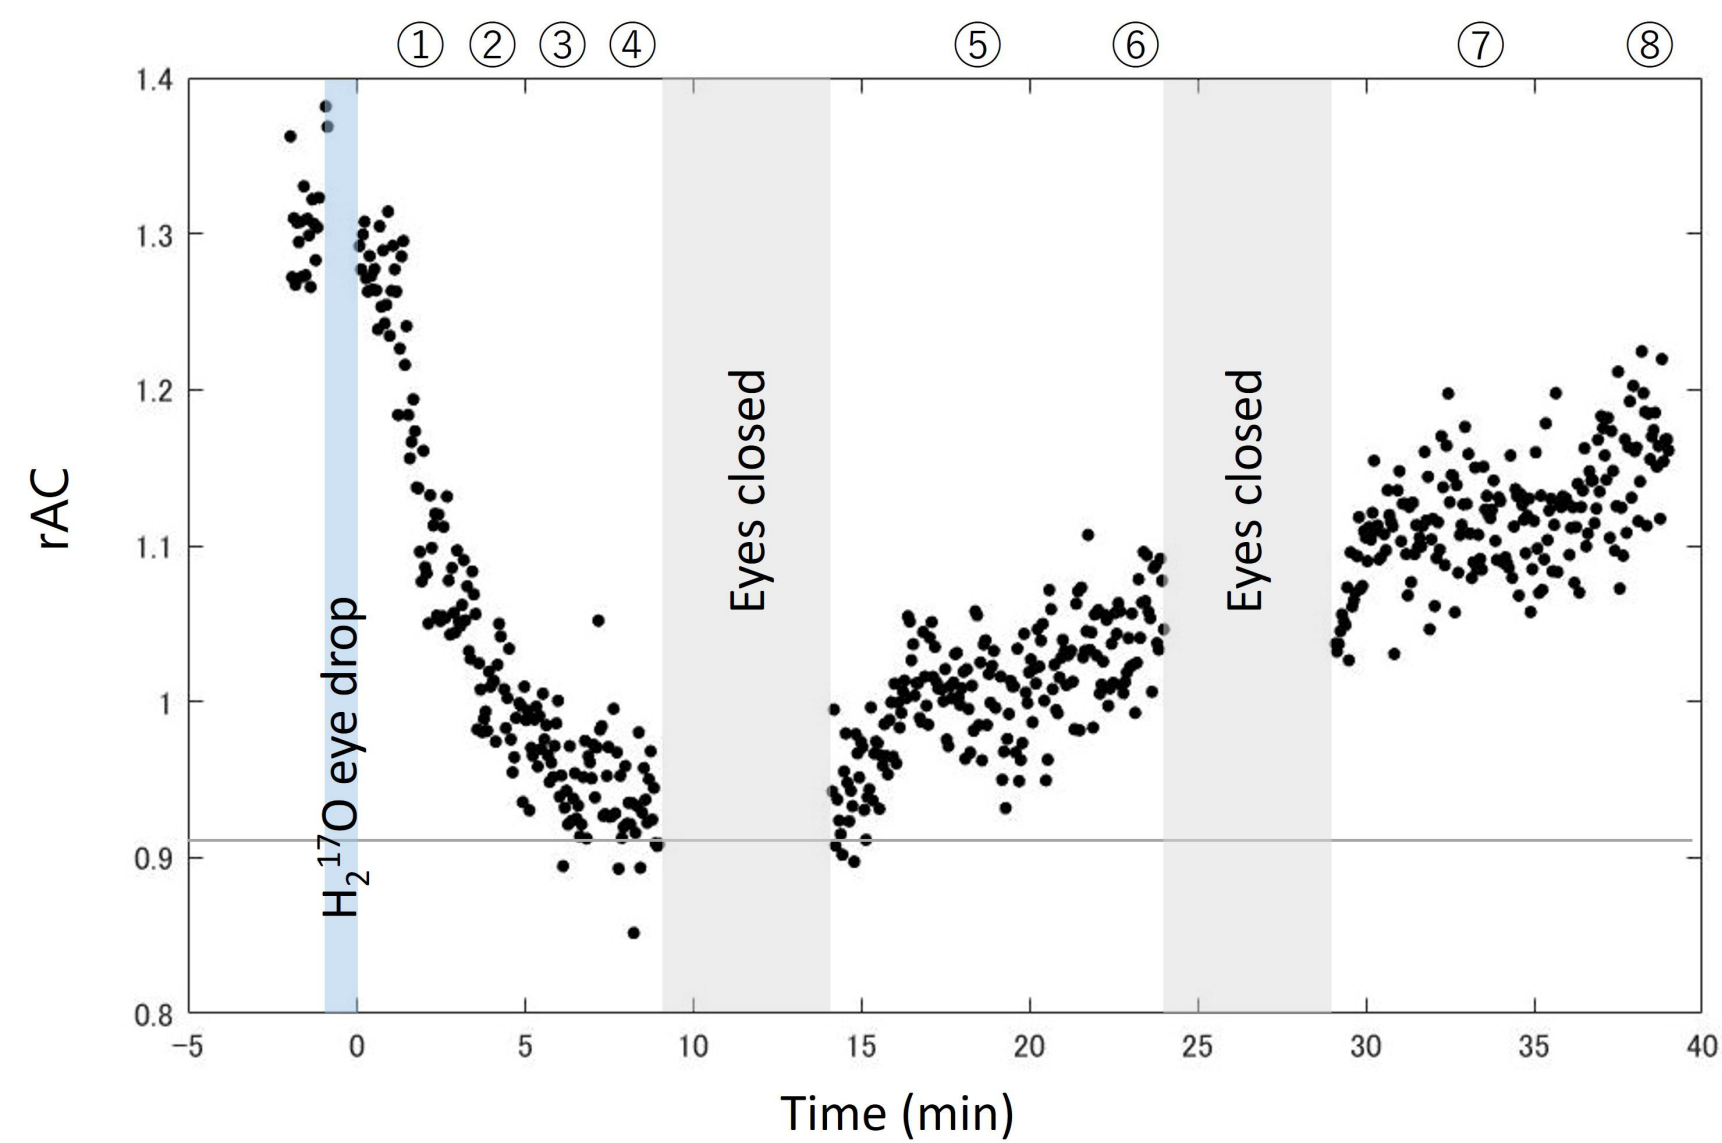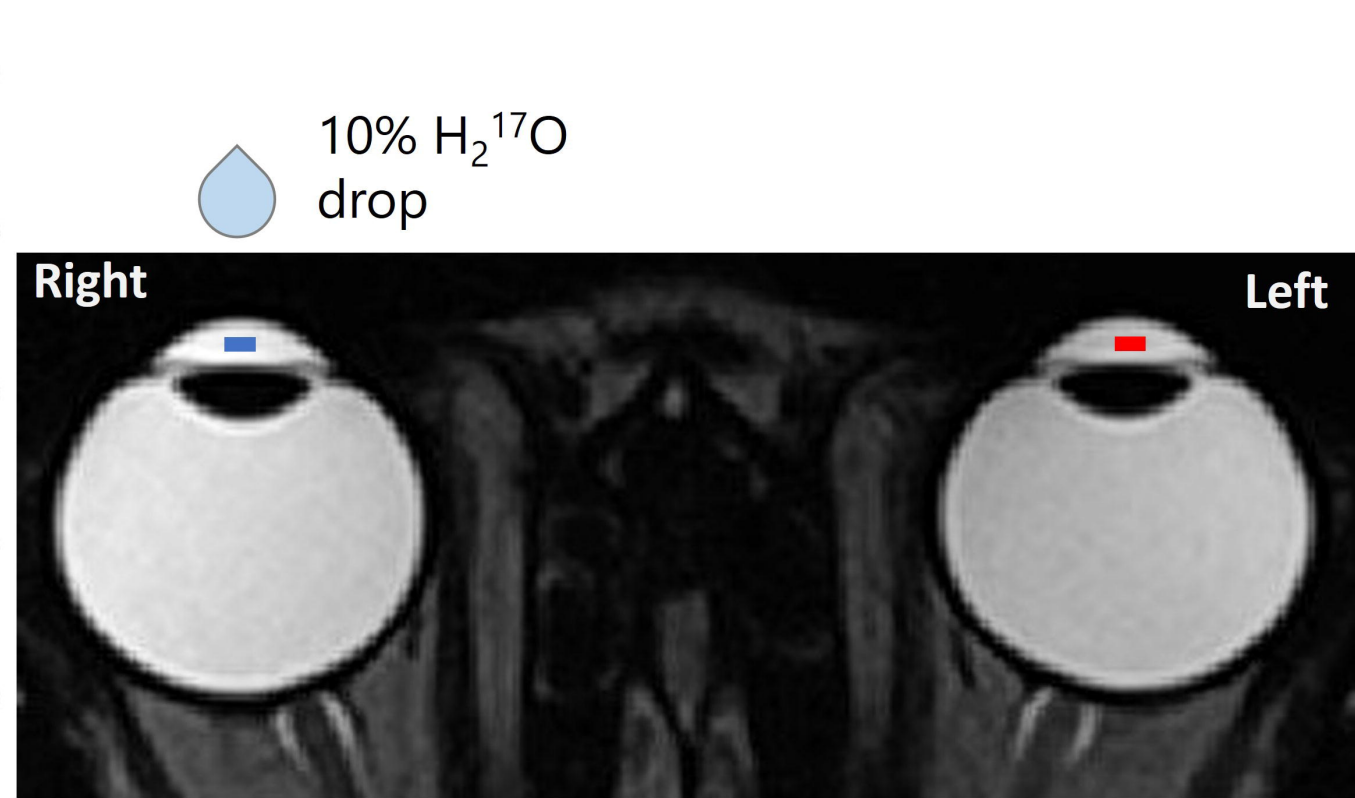

### Subject 01

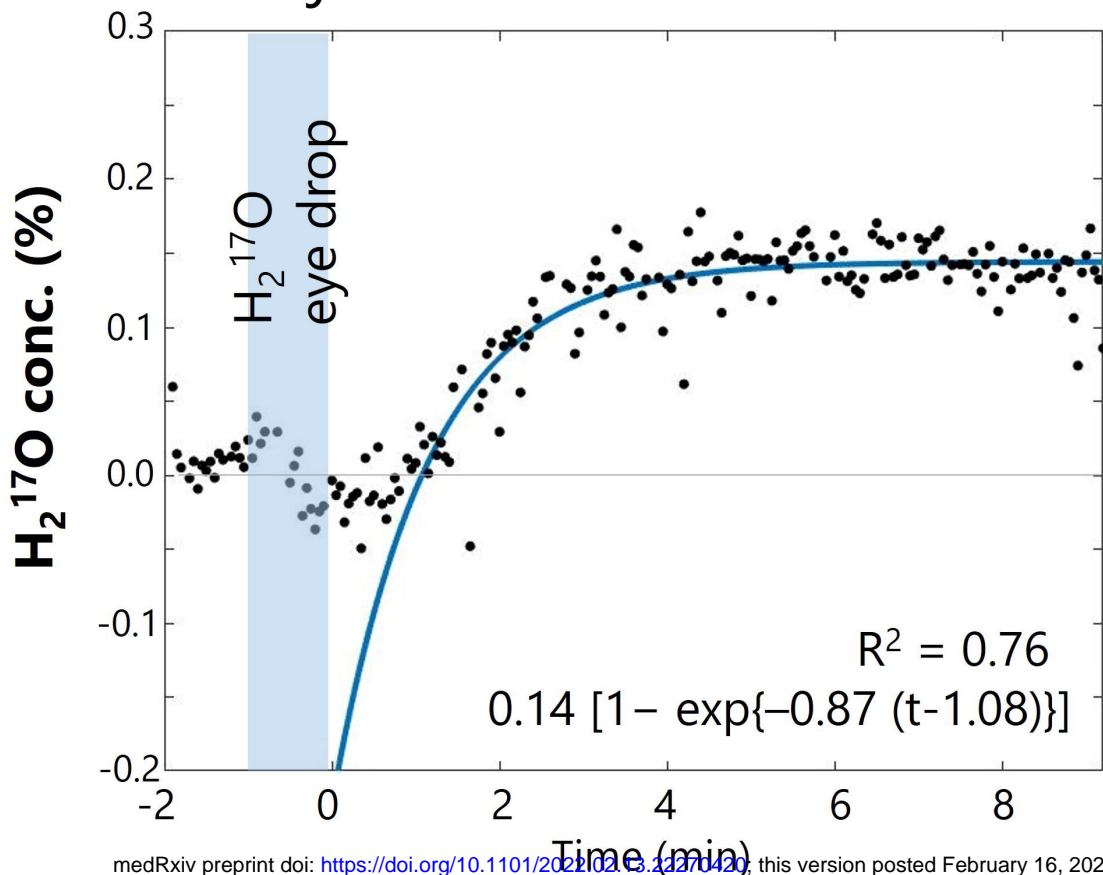

### Subject 03

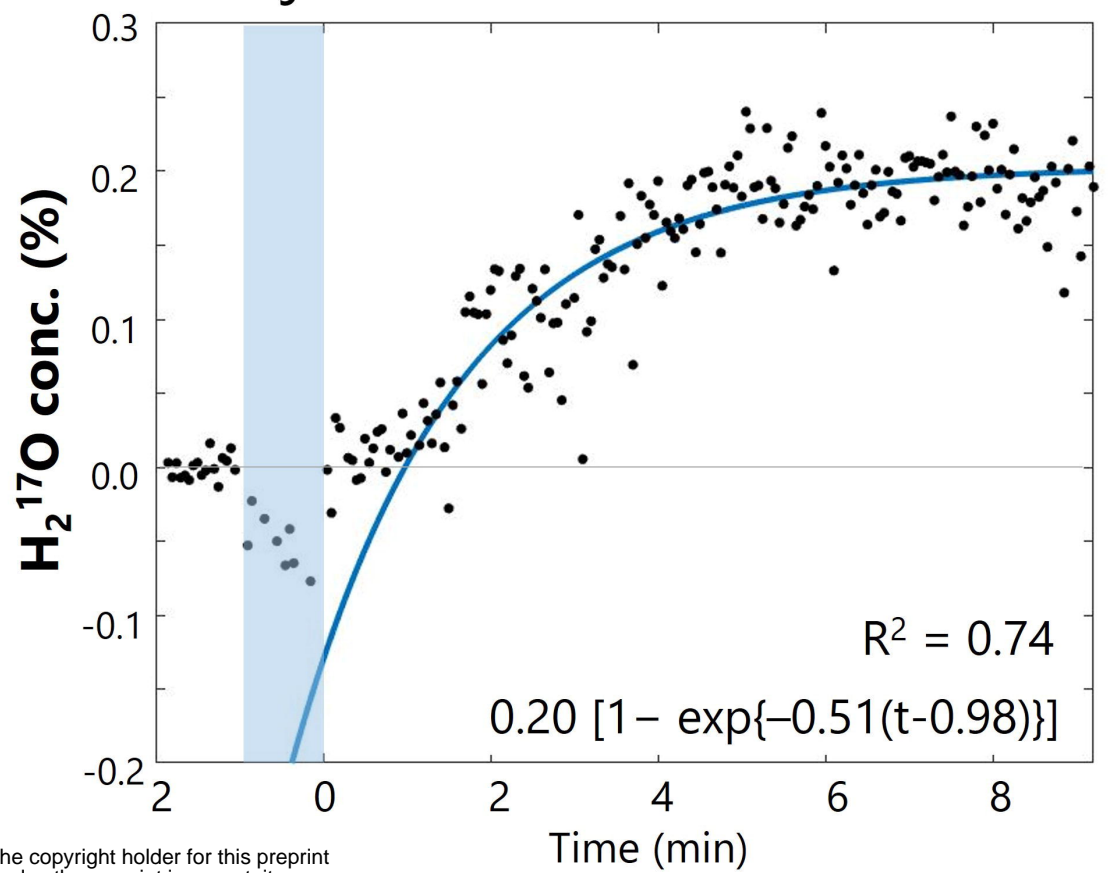

medRxiv preprint doi: <https://doi.org/10.1101/2022.02.13.2270420>; this version posted February 16, 2022. The copyright holder for this preprint (which was not certified by peer review) is the author/funder, who has granted medRxiv a license to display the preprint in perpetuity. It is made available under a [CC-BY-NC-ND 4.0 International license](https://creativecommons.org/licenses/by-nc-nd/4.0/).

### Subject 05

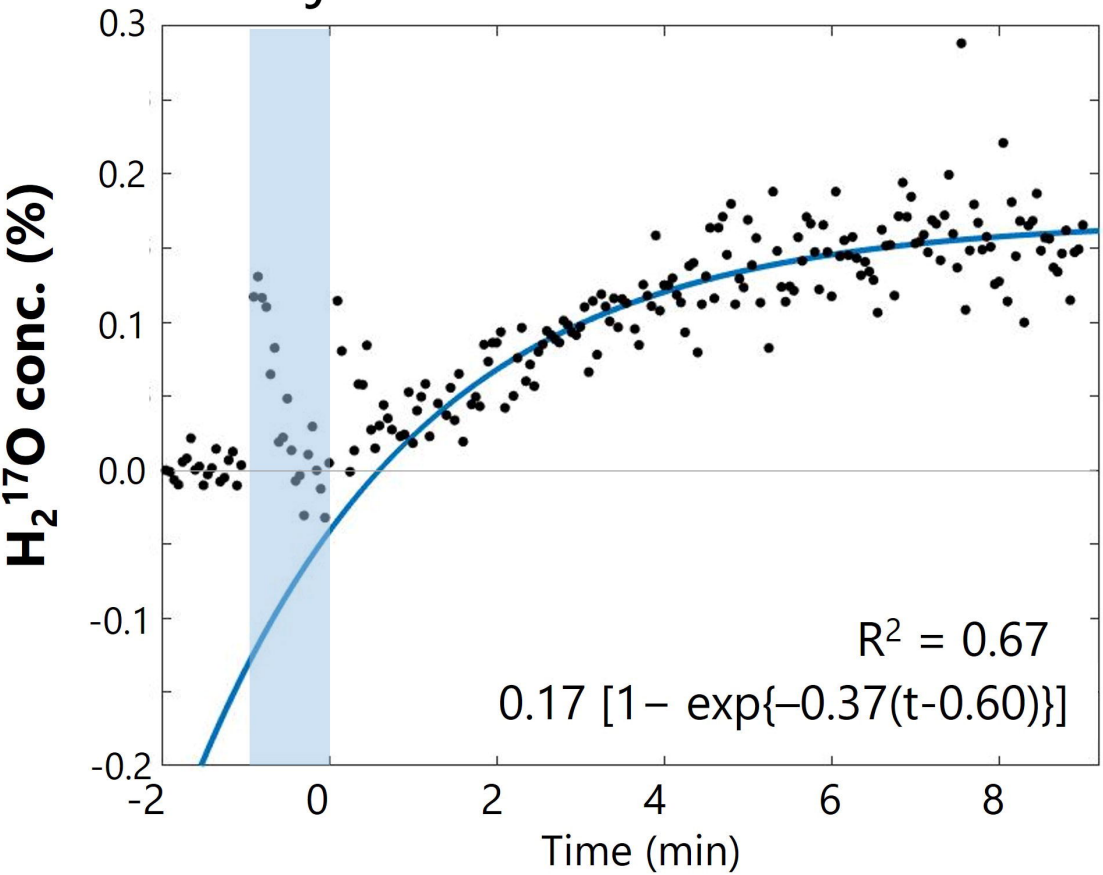

### Subject 06

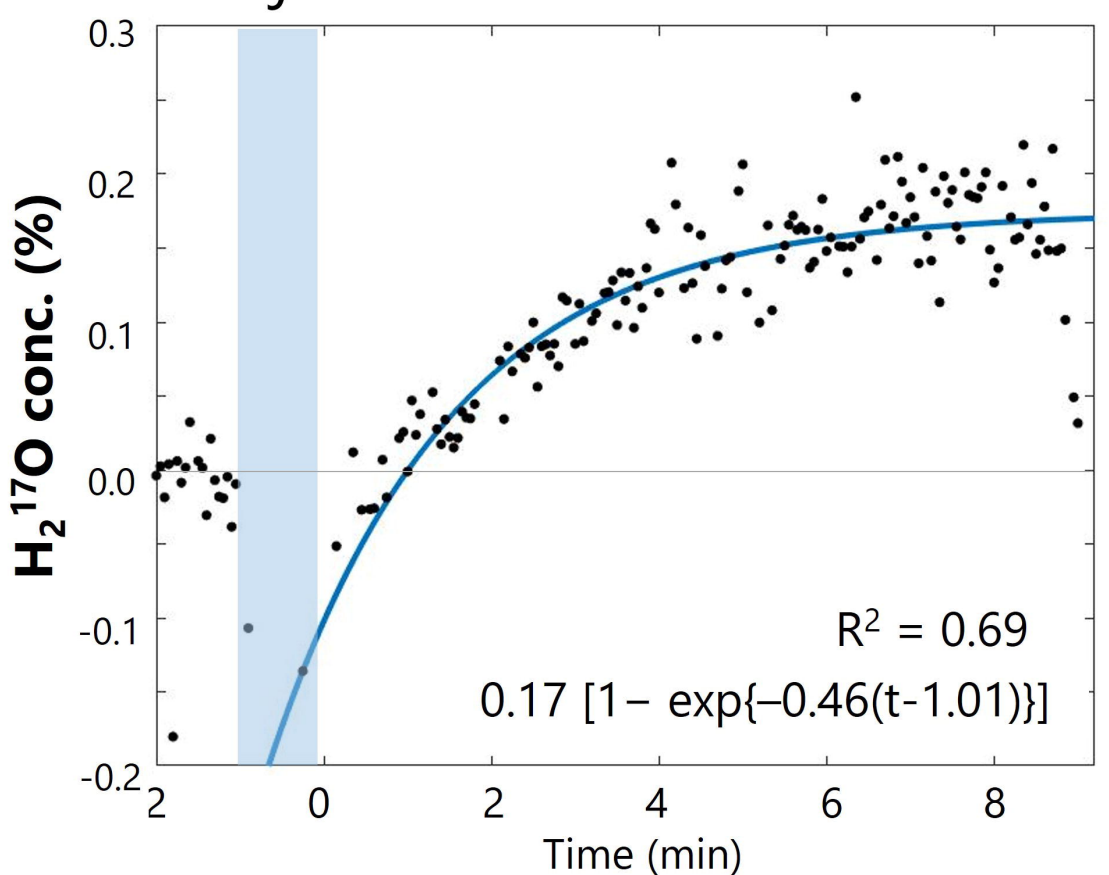

### Subject 07

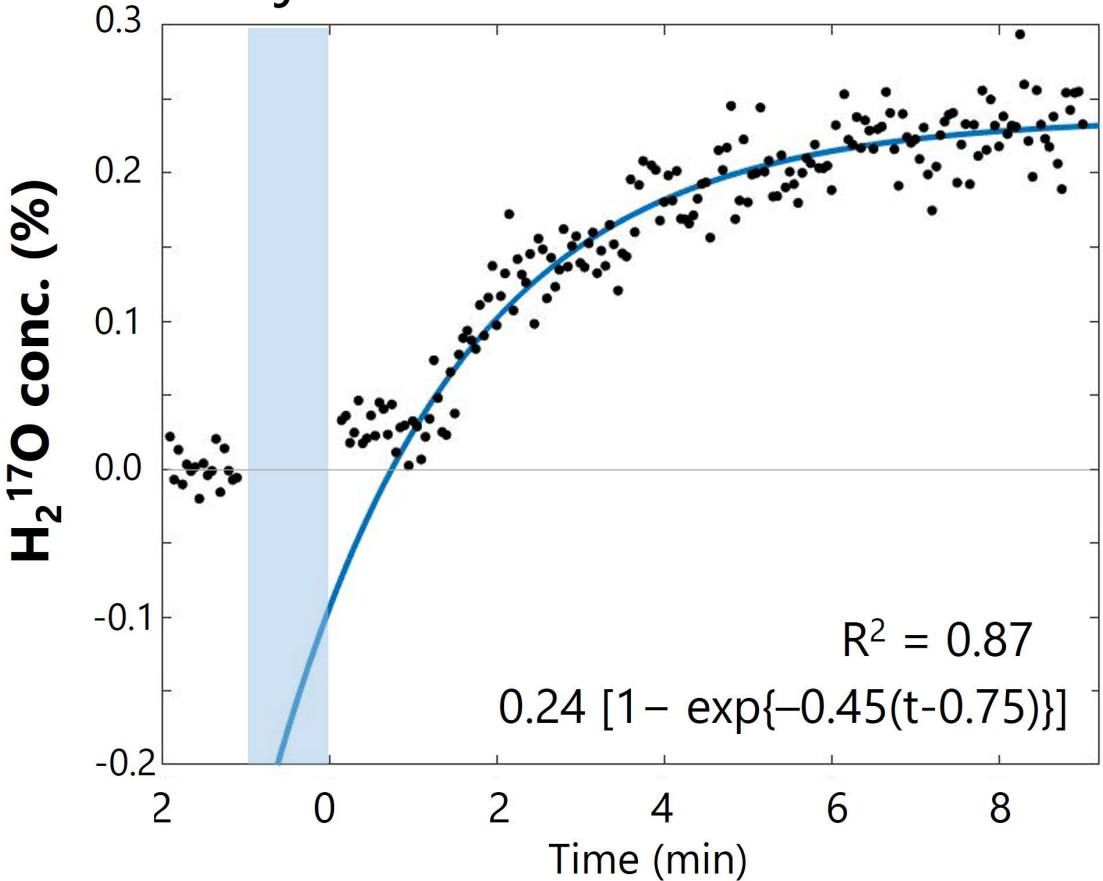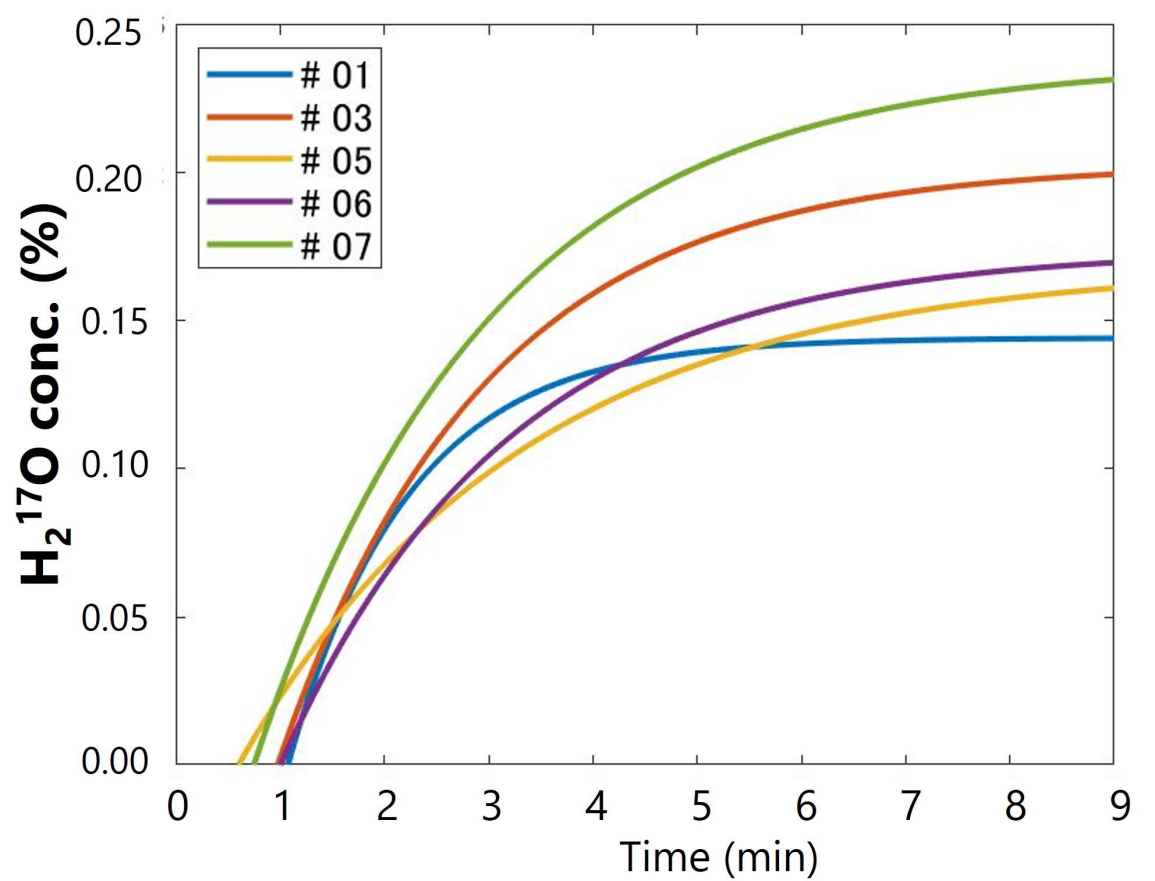

### Subject 03

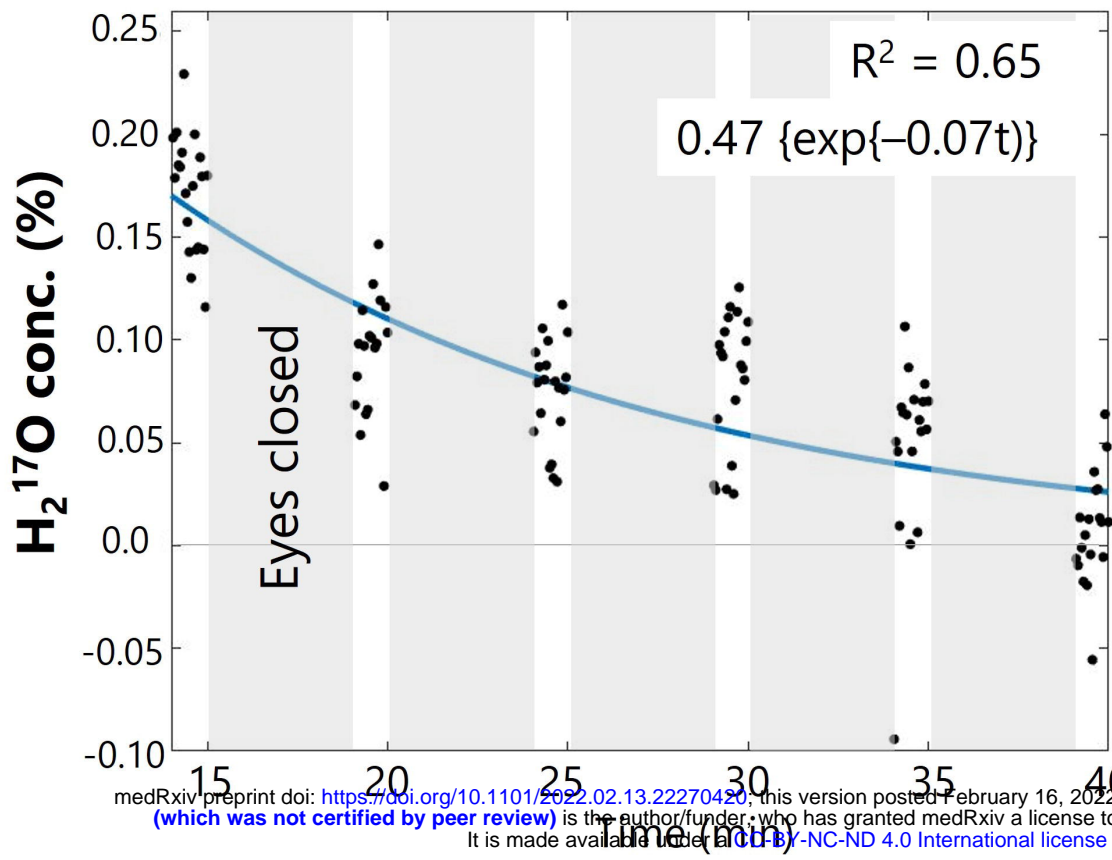

### Subject 05

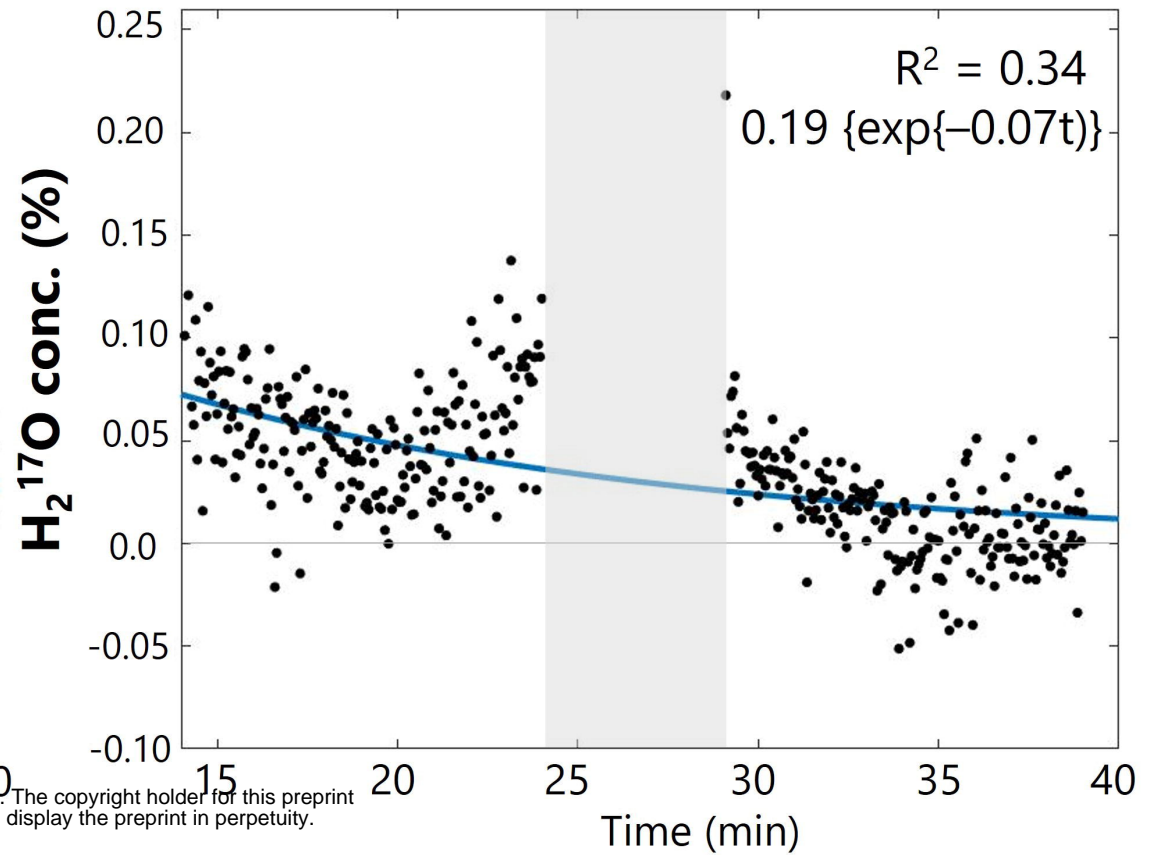

### Subject 06

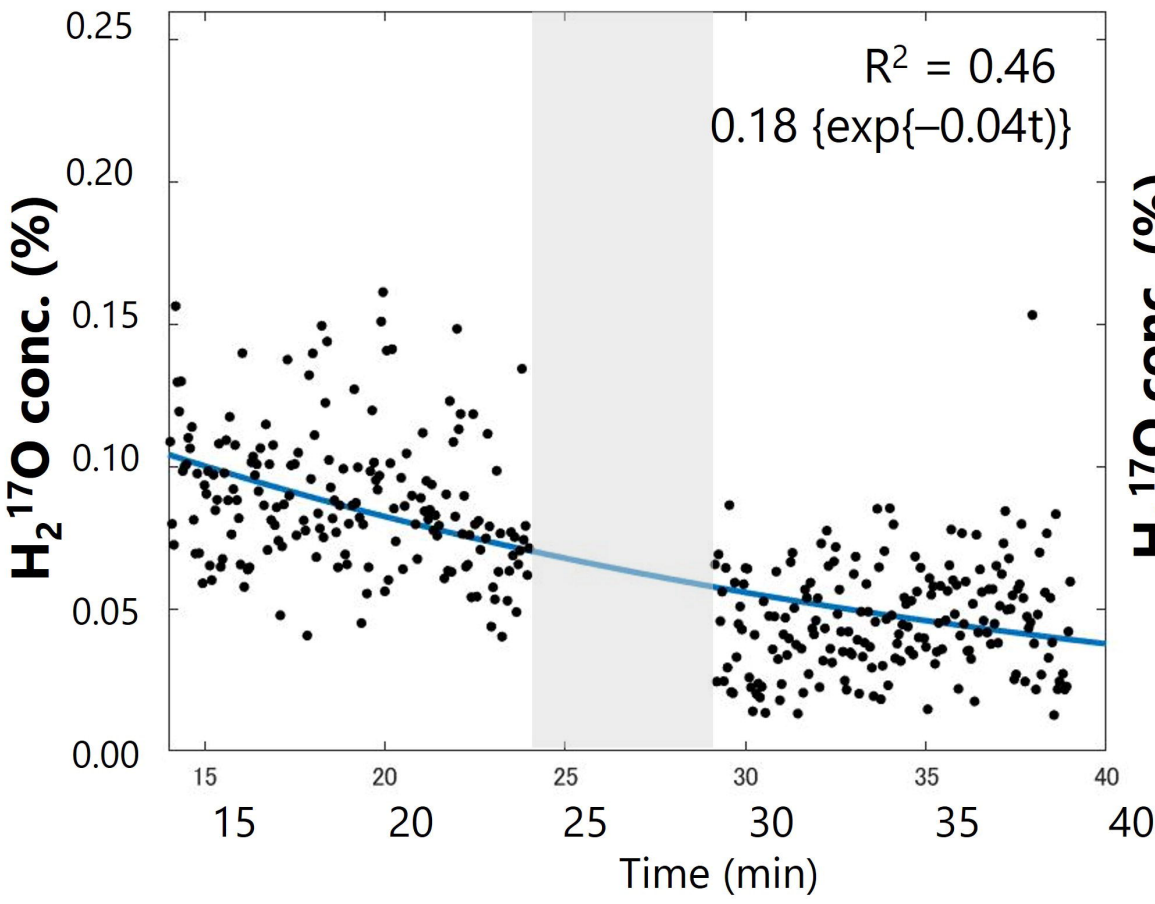

### Subject 07

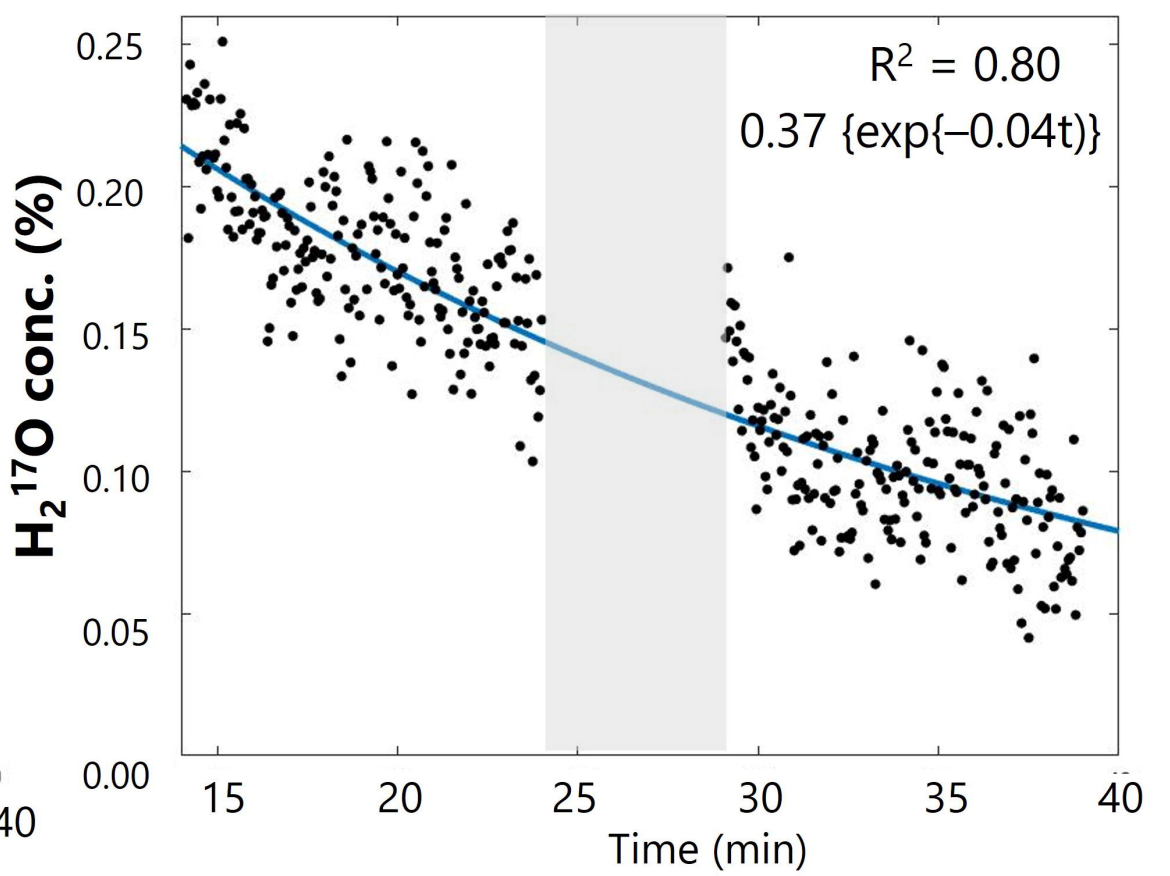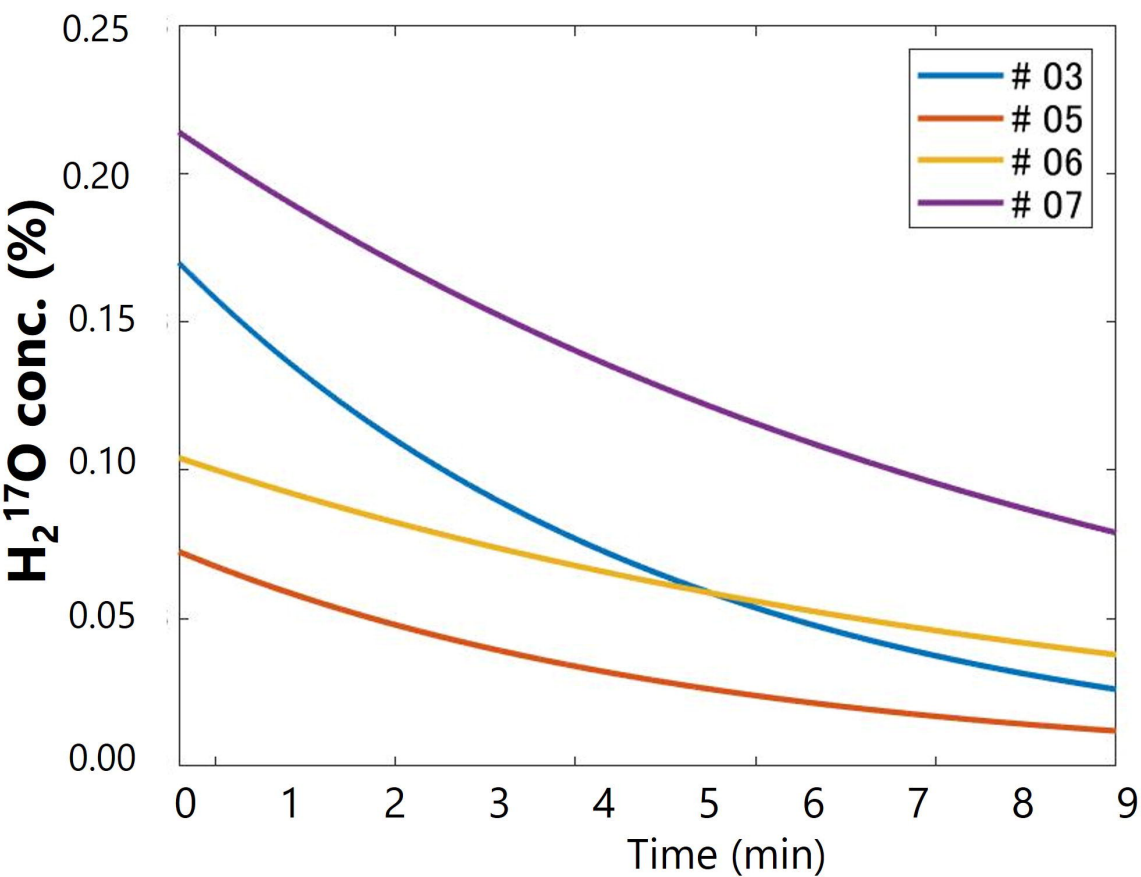

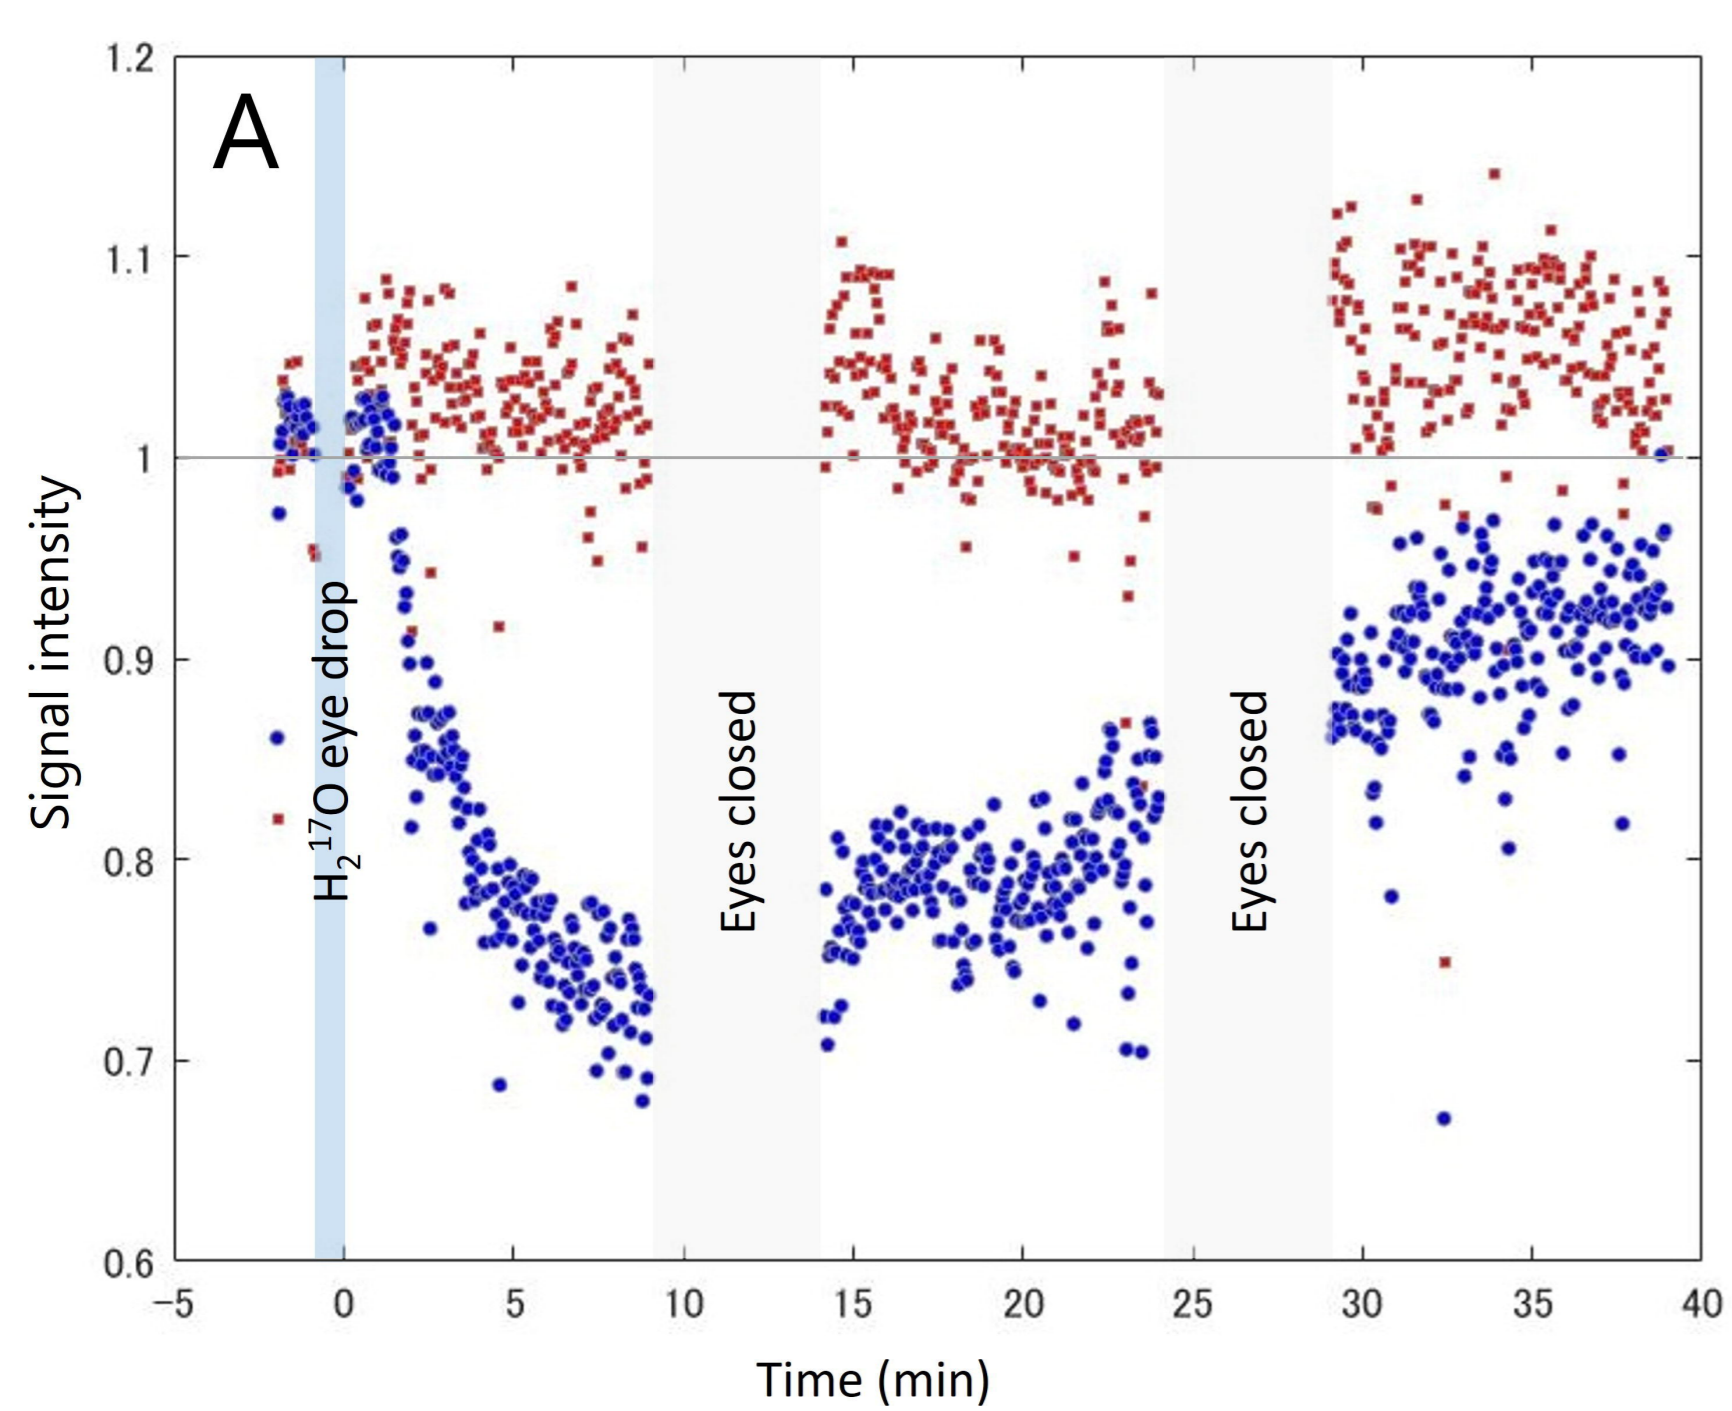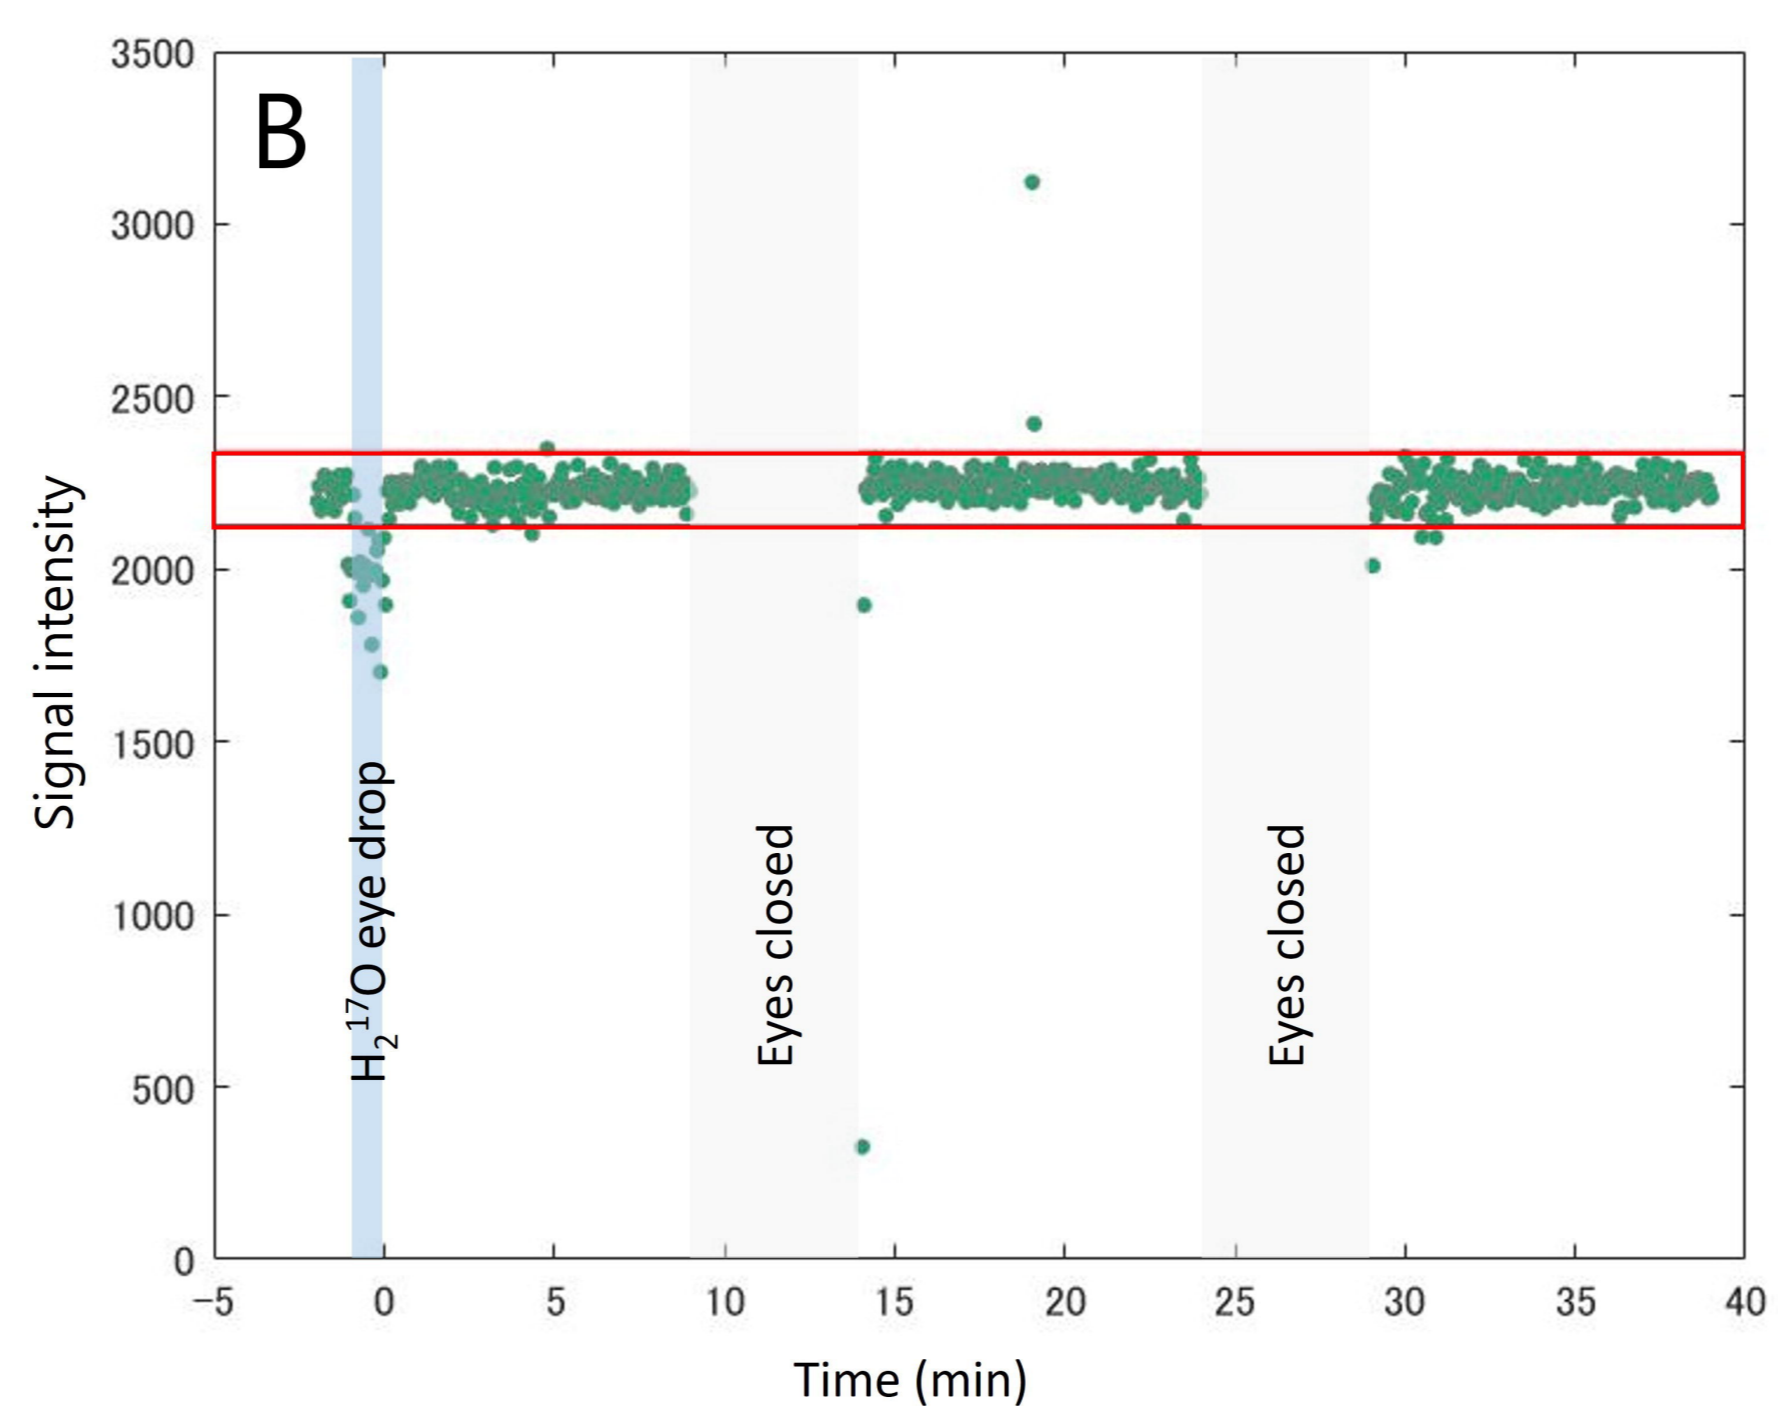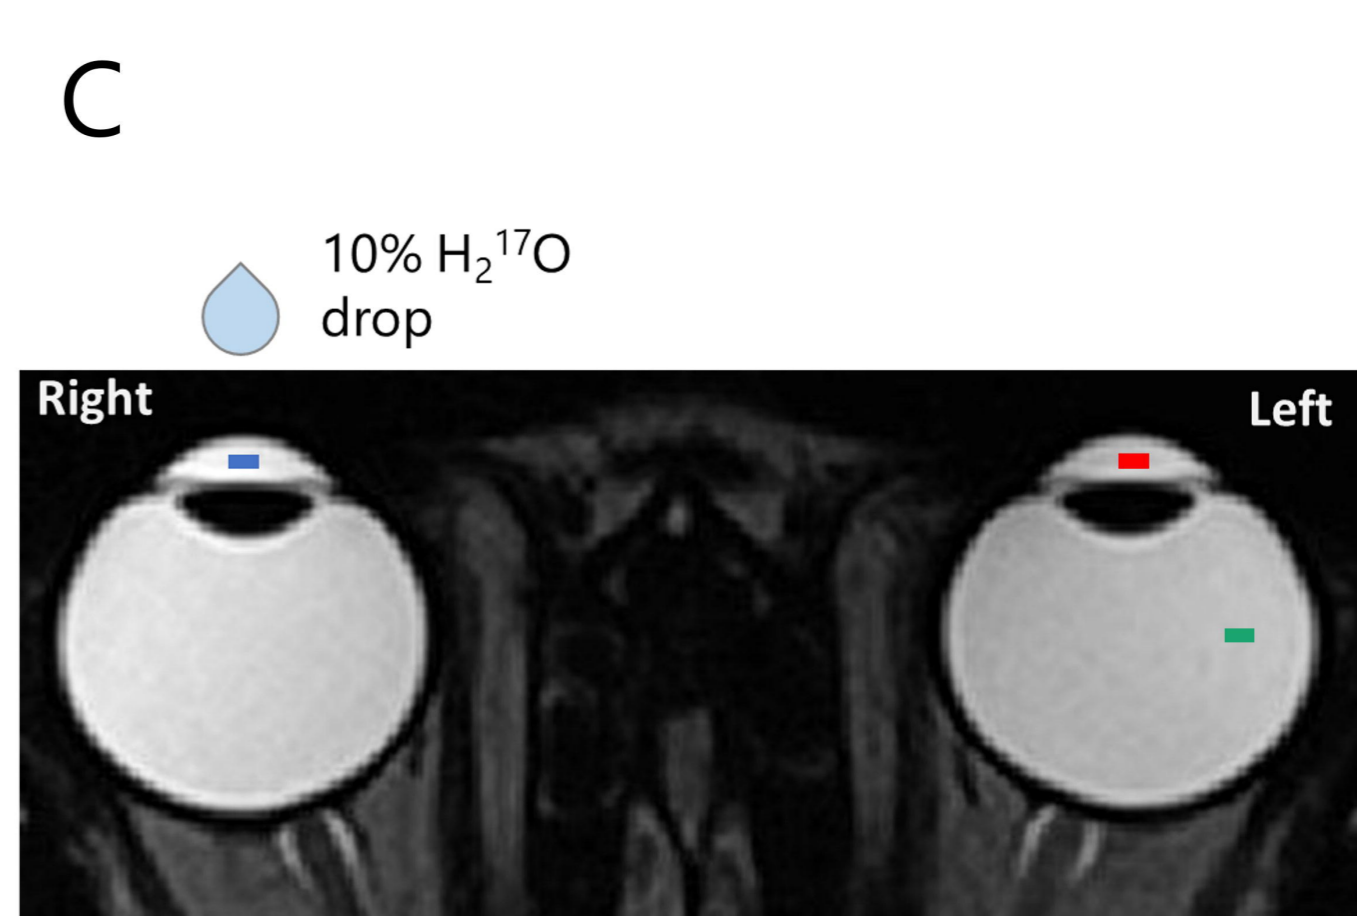

Time order  $\Rightarrow$

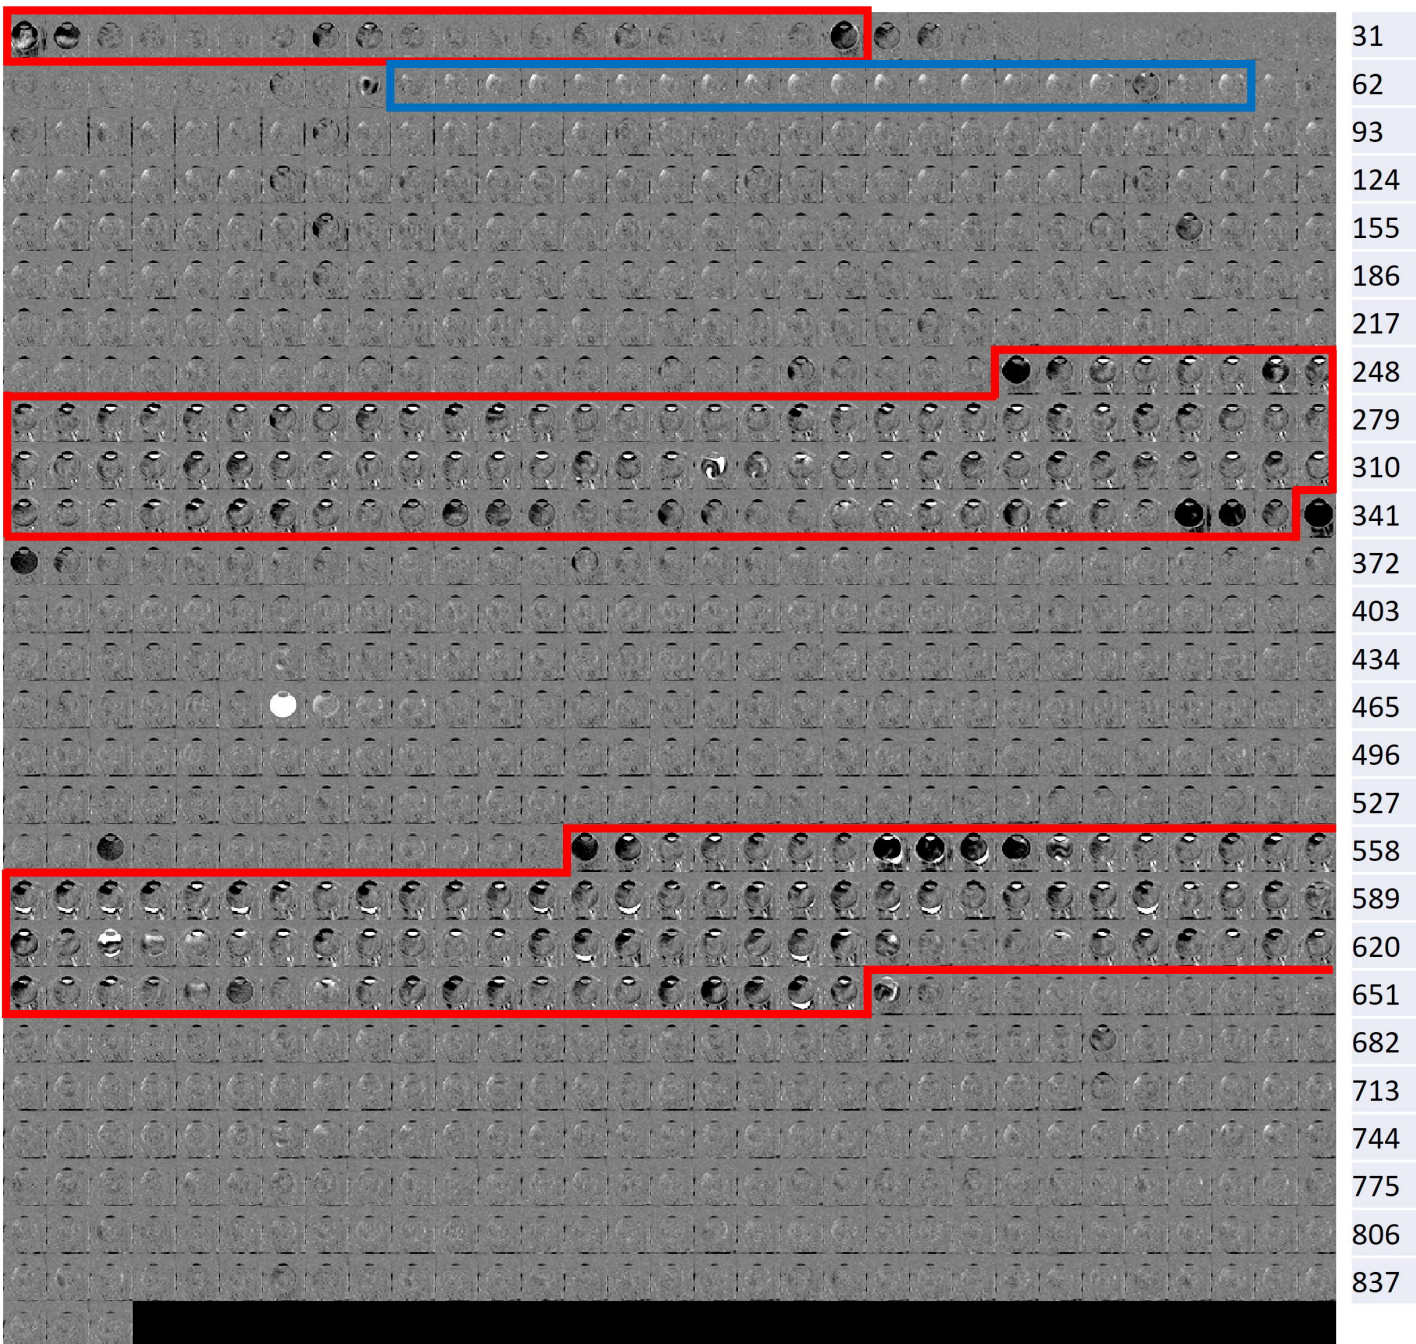

Source: https://medrxiv.org/content/10.1101/2022.02.13.22270420v1.full.pdf
